# Supplementary material
Source: MDPI journal article supplement (https://www.mdpi.com/2071-1050/11/21/6044)
Supplement: s1 [file s1]

**Regioselective Acylation of Levoglucosan  
Catalyzed by *Candida antarctica* (CaLB) lipase  
Immobilized on Epoxy Resin**

Marcelo A. do Nascimento,<sup>1</sup> Larissa E. Gotardo,<sup>1</sup> Eduardo M. Bastos,<sup>2</sup> Fabio C. L. Almeida,<sup>3</sup>  
Raquel A. C. Leão,<sup>1,4</sup> Rodrigo O. M. A. de Souza,<sup>1</sup> Robert Wojcieszak<sup>5</sup> and Ivaldo Itabaiana Jr  
<sup>6\*</sup>

1- BOSS Group - Biocatalysis and Organic Synthesis Group, Chemistry Institute, Federal University of Rio de Janeiro, CEP: 21941-909, Brazil;

2- Instituto de Macromoléculas Professora Eloisa Mano, Federal University of Rio de Janeiro, CEP 21941-598, Brazil.

3- Center of Structural Biology and Bioimaging I (CENABIO I), Federal University of Rio de Janeiro, Rio de Janeiro, Brazil.

4 – Pharmacy School, Federal University of Rio de Janeiro, CEP: 21941-170, Brazil;

5- Univ. Lille, CNRS, Centrale Lille, ENSCL, Univ. Artois, UMR 8181 - UCCS - Unité de Catalyse et Chimie du Solide, F-59000, Lille, France;

6 - Department of Biochemical Engineering, School of Chemistry, Federal University of Rio de Janeiro, CEP: 21941-910, Brazil.

Corresponding author: [ivaldo@eq.ufRJ.br](mailto:ivaldo@eq.ufRJ.br)

**Keywords:** Levoglucosan, CaLB, lipase, transesterification, esters.

## 1. Reaction Optimization

The reaction of levoglucosan (1) and aliphatic esters (laurate, palmitate, stearate and oleate, respectively) was optimized for the formation of products with respect to different biocatalysts (N435, Calb\_epoxy and PSIM) and incubation temperature.

**Table 1:** Regioselectivity in the enzymatic acetylation of levoglucosan in CH<sub>3</sub>CN with ethyl aliphatic esters. Analyses were performed in a GC-MS.

| <p>1 + 2 a: R=CH<sub>3</sub>(CH<sub>2</sub>)<sub>10</sub><br/> b: R=CH<sub>3</sub>(CH<sub>2</sub>)<sub>14</sub><br/> c: R=CH<sub>3</sub>(CH<sub>2</sub>)<sub>16</sub><br/> d: R=CH<sub>3</sub>(CH<sub>2</sub>)<sub>7</sub>CHCH(CH<sub>2</sub>)<sub>7</sub></p> <p>Biocatalyst 0.8 % (v/v)<br/> Acetonitrile<br/> 50-65 °C, 120 h</p> <p>3-I 3-II 3-III 4</p> |                          |                         |                      |      |       |      |      |       |      |      |       |
|--------------------------------------------------------------------------------------------------------------------------------------------------------------------------------------------------------------------------------------------------------------------------------------------------------------------------------------------------------------|--------------------------|-------------------------|----------------------|------|-------|------|------|-------|------|------|-------|
| Entry                                                                                                                                                                                                                                                                                                                                                        | Biocatalyst <sup>1</sup> | Acyl Donor <sup>2</sup> | Regioselectivity (%) |      |       |      |      |       |      |      |       |
|                                                                                                                                                                                                                                                                                                                                                              |                          |                         | 50°C                 |      |       | 55°C |      |       | 65°C |      |       |
|                                                                                                                                                                                                                                                                                                                                                              |                          |                         | 3-I                  | 3-II | 3-III | 3-I  | 3-II | 3-III | 3-I  | 3-II | 3-III |
| 1                                                                                                                                                                                                                                                                                                                                                            | N435                     | a                       | 99                   | -    | -     | 48   | -    | 52    | 51   | -    | 49    |
| 2                                                                                                                                                                                                                                                                                                                                                            |                          | b                       | 46                   | -    | 54    | 50   | -    | 50    | 50   | -    | 50    |
| 3                                                                                                                                                                                                                                                                                                                                                            |                          | c                       | 23                   | 23   | 54    | 51   | -    | 49    | 60   | -    | 40    |
| 4                                                                                                                                                                                                                                                                                                                                                            |                          | d                       | 72                   | -    | 28    | 68   | -    | 32    | 66   | -    | 34    |
| 5                                                                                                                                                                                                                                                                                                                                                            | CalB_epoxy               | a                       | 73                   | -    | 27    | 64   | -    | 36    | 99   | -    | -     |
| 6                                                                                                                                                                                                                                                                                                                                                            |                          | b                       | 51                   | -    | 49    | 73   | -    | 27    | 94   | -    | 6     |
| 7                                                                                                                                                                                                                                                                                                                                                            |                          | c                       | -                    | -    | -     | 78   | -    | 22    | 81   | -    | 19    |
| 8                                                                                                                                                                                                                                                                                                                                                            |                          | d                       | 99                   | -    | -     | 83   | -    | 17    | 99   | -    | -     |
| 9                                                                                                                                                                                                                                                                                                                                                            | PSIM                     | a                       | 99                   | -    | -     | 87   | -    | 13    | 95   | 5    | -     |
| 10                                                                                                                                                                                                                                                                                                                                                           |                          | b                       | 90                   | -    | 10    | 79   | -    | 21    | 99   | -    | -     |
| 11                                                                                                                                                                                                                                                                                                                                                           |                          | c                       | 72                   | 28   | -     | 43   | 14   | 43    | -    | -    | -     |
| 12                                                                                                                                                                                                                                                                                                                                                           |                          | d                       | 74                   | -    | 26    | 97   | -    | 3     | 99   | -    | -     |

## 2. Analytical Methods

<sup>1</sup>H-NMR, <sup>13</sup>C-NMR; COSY, NOEDIFF, HMBC, HSQC and Dept135 spectra were recorded on a Bruker Advance 400 and 500 MHz spectrometer. Reported chemical shifts (δ) are expressed in parts per million (ppm) down field from tetra methyl silane (TMS) and the coupling constant (J) in Hz.

<sup>1</sup> N435 = Novozym 435 (*Candida antarctica* lipase B), immobilized on macroporous acrylic type ion exchange resin; CalB\_epoxy = *Candida antarctica* lipase B immobilized on epoxy support by our research group and PSIM = lipase from *Pseudomonas cepacia* immobilized on ceramic particles.

<sup>2</sup> 2 equivalents, a = ethyl laurate, b = ethyl palmitate, c = ethyl stearate and d = ethyl oleate.

GC analysis was performed on a Shimadzu CG2010 – SLB-5MS capillary column 30 m, 0.25 mm ID, 0.25  $\mu$ m film thickness (MS) and with helium used as the carrier gas. The injector and detector temperatures were 250°C, and The oven was maintained at 80 °C for 4 min, increased to 200 °C at a rate of 6 °C/min for 10 min, increased to 310 °C at a rate of 8 °C/min, when it was held constant for 4 min, totaling 51.75 min. High Resolution Mass Spectrometric Analysis (HRMS).

Infrared spectra were obtained in KBr pellets (complexes), in NICOLET MAGNA FTIR-760 (4000-400  $\text{cm}^{-1}$ ) spectrophotometer.

## 2.1. GC-MS

In this section, we will show the illustrative chromatograms obtained in the steps of higher product conversions with their respective mass spectra, in the transesterification reactions with ethyl laurate, ethyl palmitate, ethyl stearate and ethyl oleate for the synthesis of levoglucosan esters.

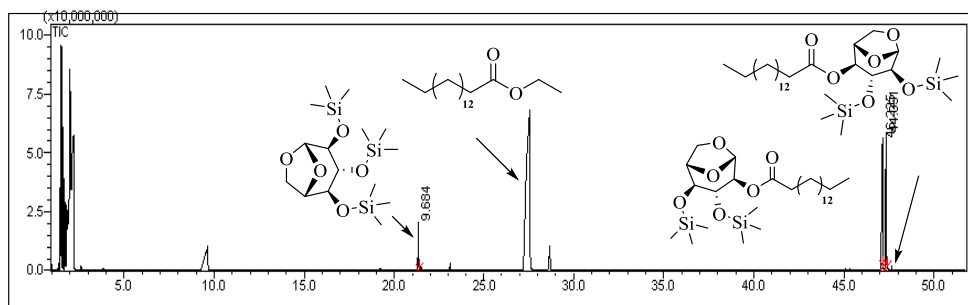

**Figure 1:** Chromatogram of levoglucosan reaction medium with ethyl palmitate using N435 (derivatized) 55 °C. Peak with retention time at 9.2 for excess BSTFA.

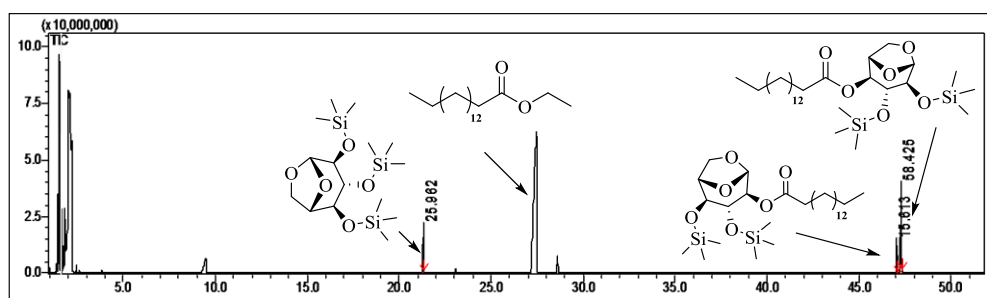

**Figure 2:** Chromatogram of levoglucosan reaction medium with ethyl palmitate using PSIM (derivatized) 55 °C. Peak with retention time at 9.2 for excess BSTFA

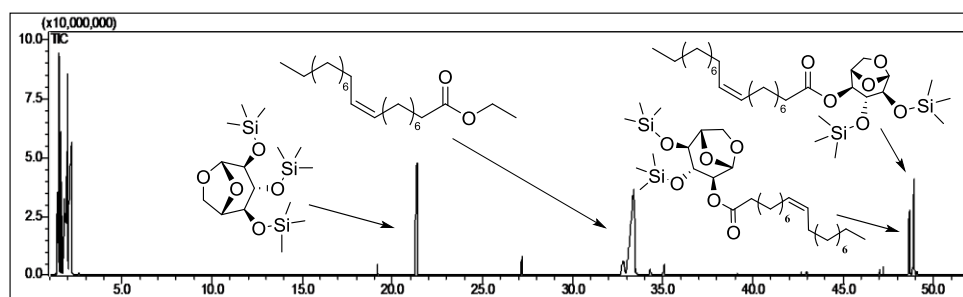

**Figure 3:** Chromatogram of levoglucosan reaction medium with ethyl oleate using **CaLB\_epoxy** (derivatized) 55 °C.

## 2.2. HRMS

High Resolution Mass Spectrometric Analysis (HRMS) for 4-O-Lauryl-1,6-anhydroglucopyranose, where a) found and b) calculated.

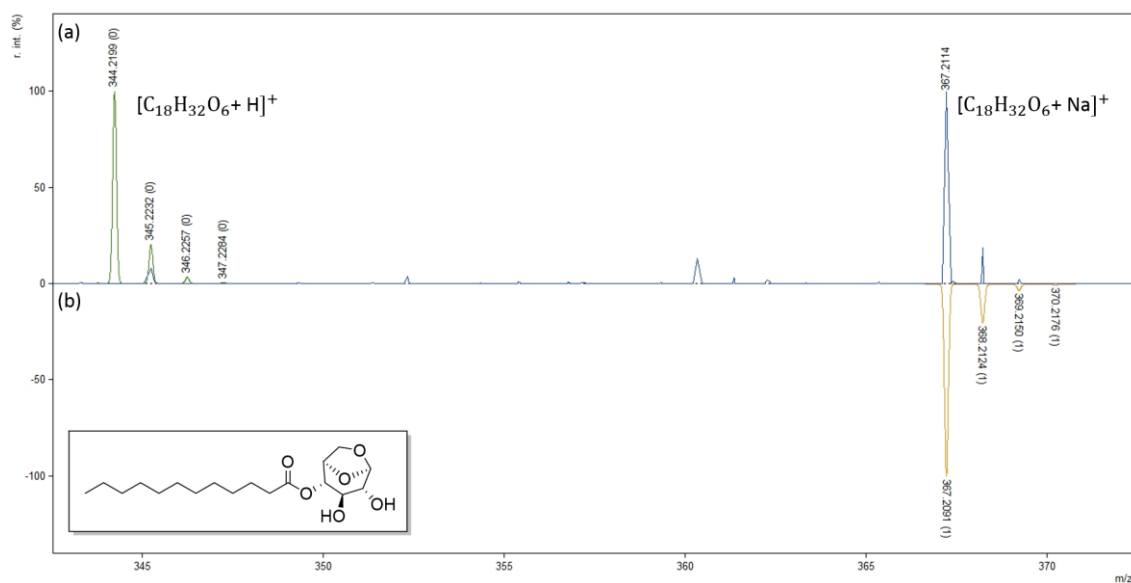

78 High Resolution Mass Spectrometric Analysis (HRMS) for 4-O-Palmitoyl-1,6-  
 79 anhydroglucopyranose, where a) found and b) calculated.

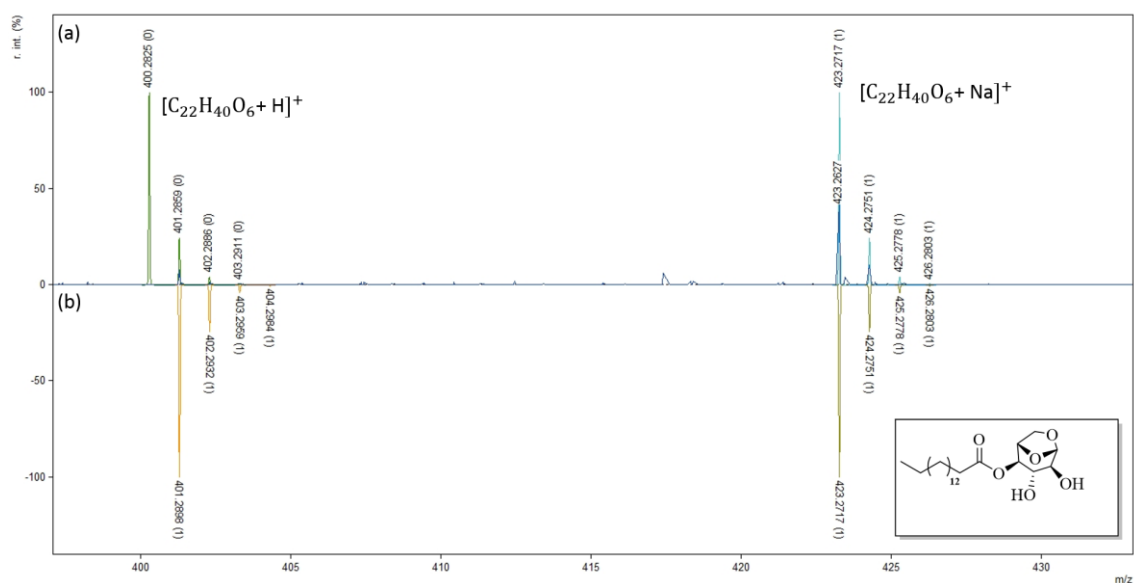

80

81

82

83 High Resolution Mass Spectrometric Analysis (HRMS) for 2-O-Palmitoyl-1,6-  
 84 anhydroglucopyranose, where a) found and b) calculated.

85

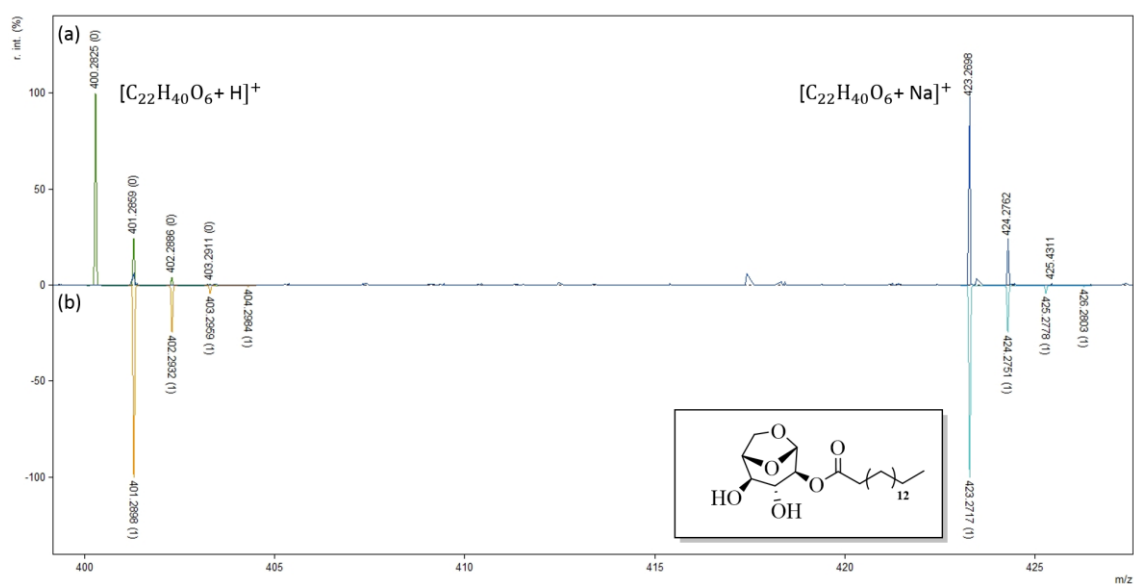

86

87

88 High Resolution Mass Spectrometric Analysis (HRMS) for 4-O-Stearyl-1,6-  
 89 anhydroglucopyranose, where a) found and b) calculated.

90

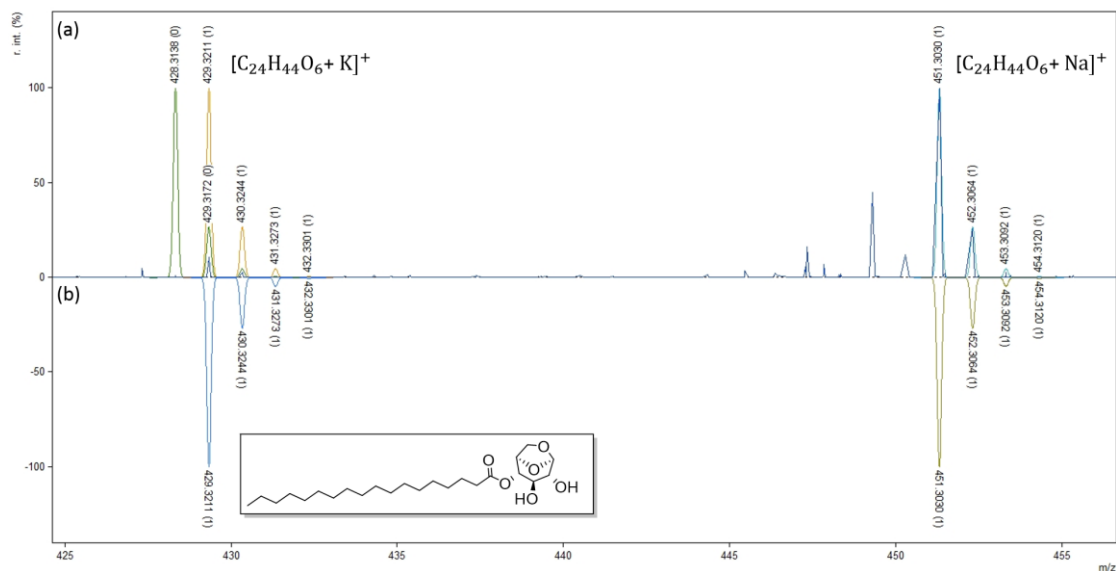

91

92

93

94 High Resolution Mass Spectrometric Analysis (HRMS) for 4-O-Oleoyl-1,6-  
 95 anhydroglucopyranose, where a) found and b) calculated.

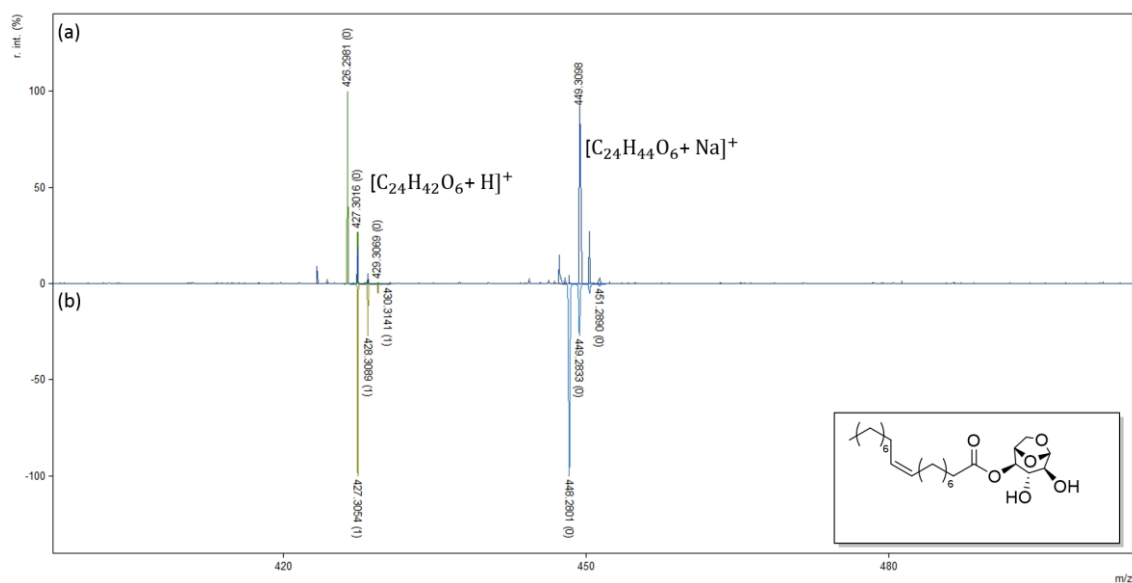

98 High Resolution Mass Spectrometric Analysis (HRMS) for 2-O-Oleoyl-1,6-  
 99 anhydroglucopyranose, where a) found and b) calculated.

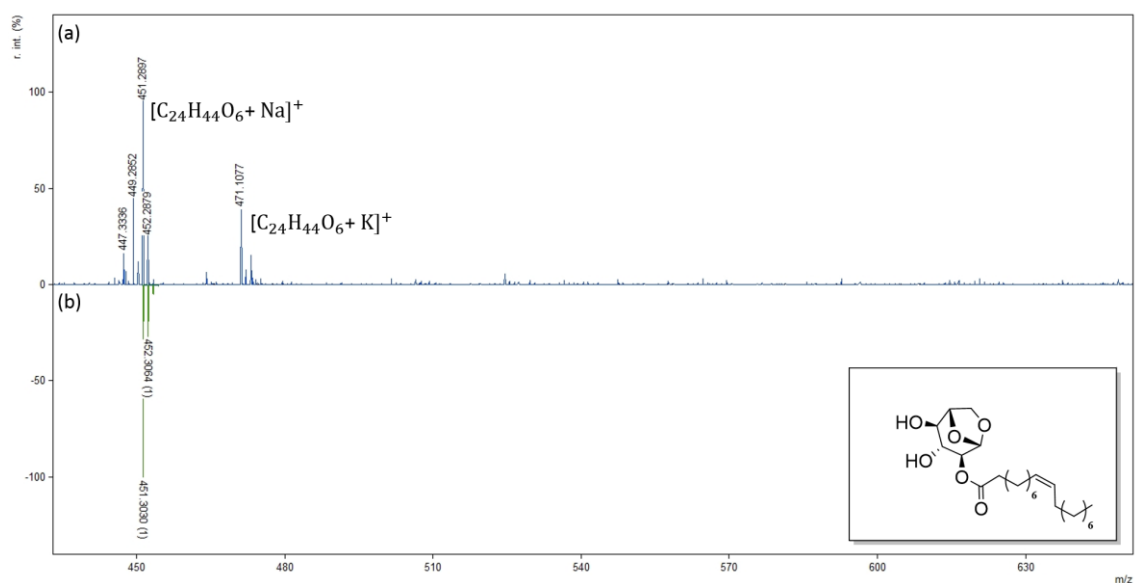

### 2.3. Fourier Transform Infrared Spectroscopy (FTIR)

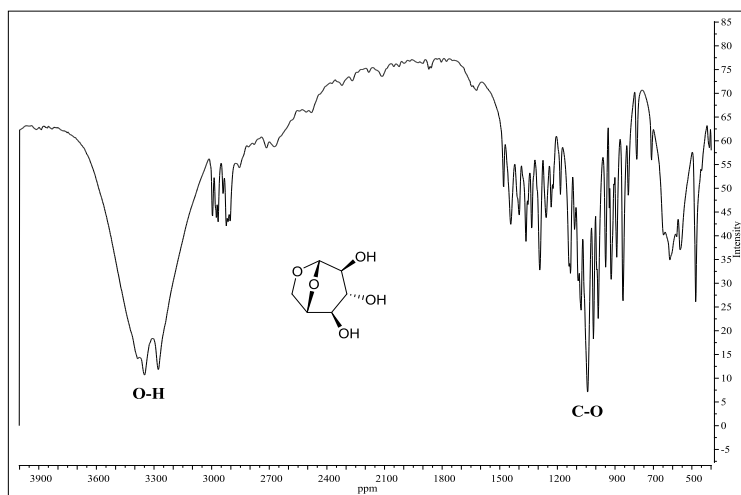

Figure 4: Infrared spectrum of levoglucosan.

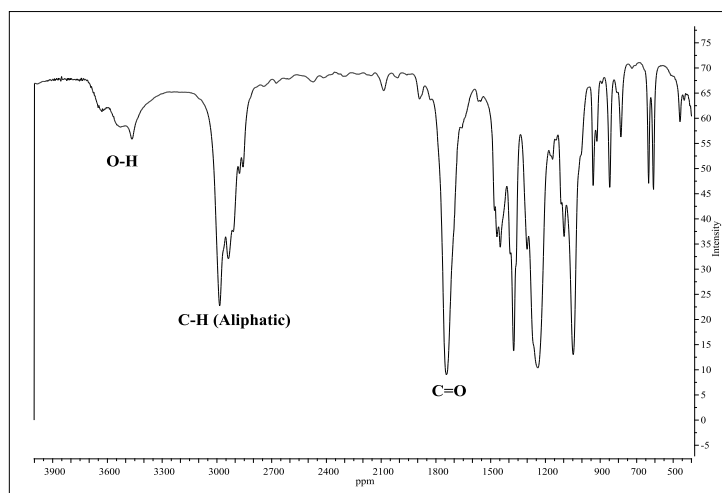

**Figure 5:** Infrared spectrum of the transesterification reaction of levoglucosan with ethyl oleate.



119 2.4. Nuclear Magnetic Resonance (NMR)

120

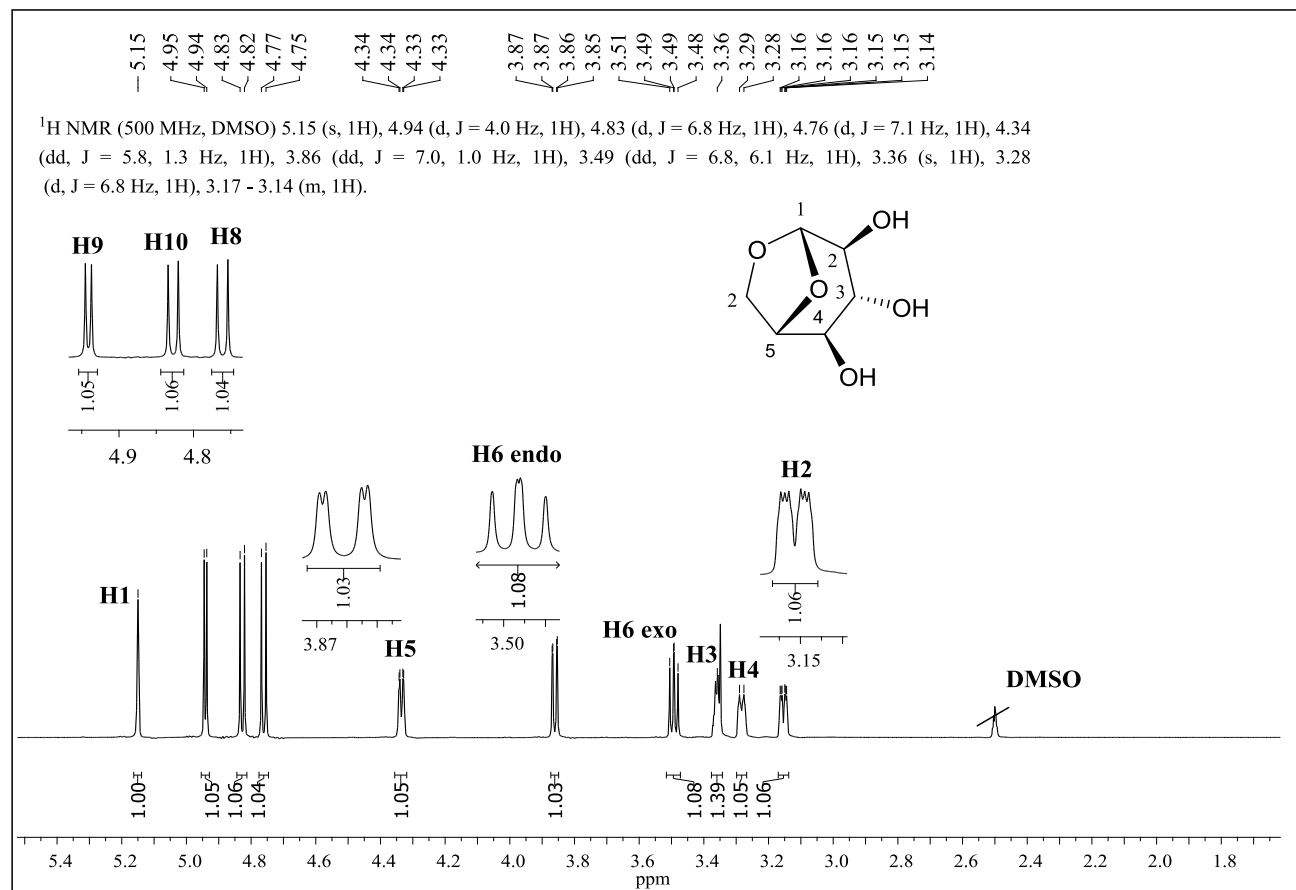

Figure 6: <sup>1</sup>H-NMR spectrum for levoglucosan (DMSO).

121  
122  
123

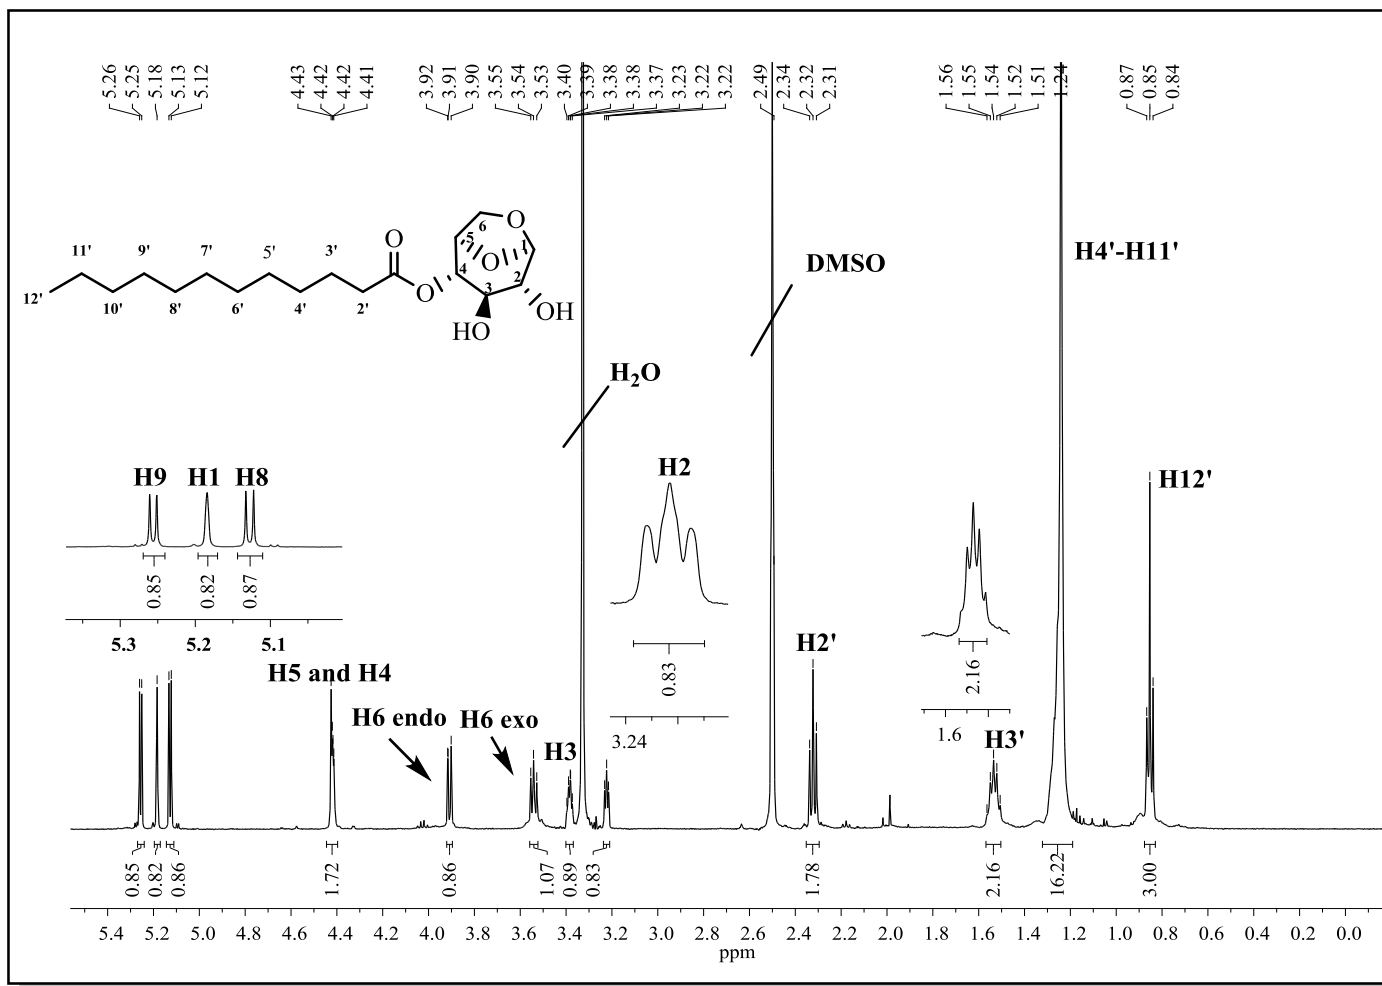

**Figure 7:**  $^1\text{H}$ -NMR Spectrum for 4-O-Lauryl-1,6-anhydroglucopyranose ( $\text{CDCl}_3$ ).

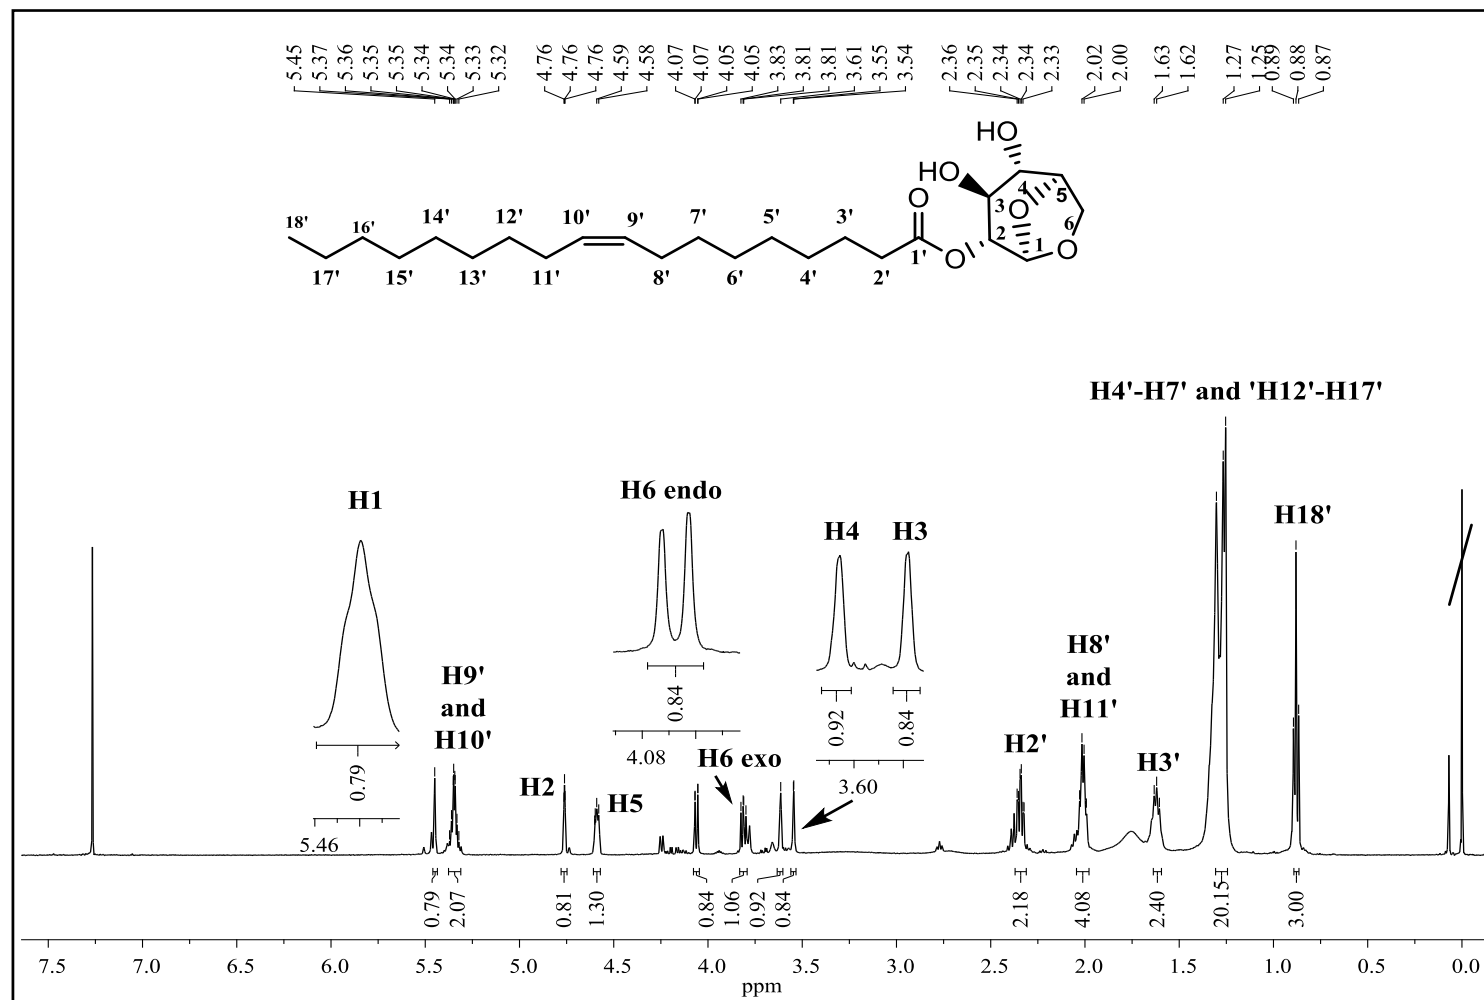

Figure 8: <sup>1</sup>H-NMR Spectrum for 2-O-Oleoyl-1,6-anhydroglucopyranose (CDCl<sub>3</sub>).

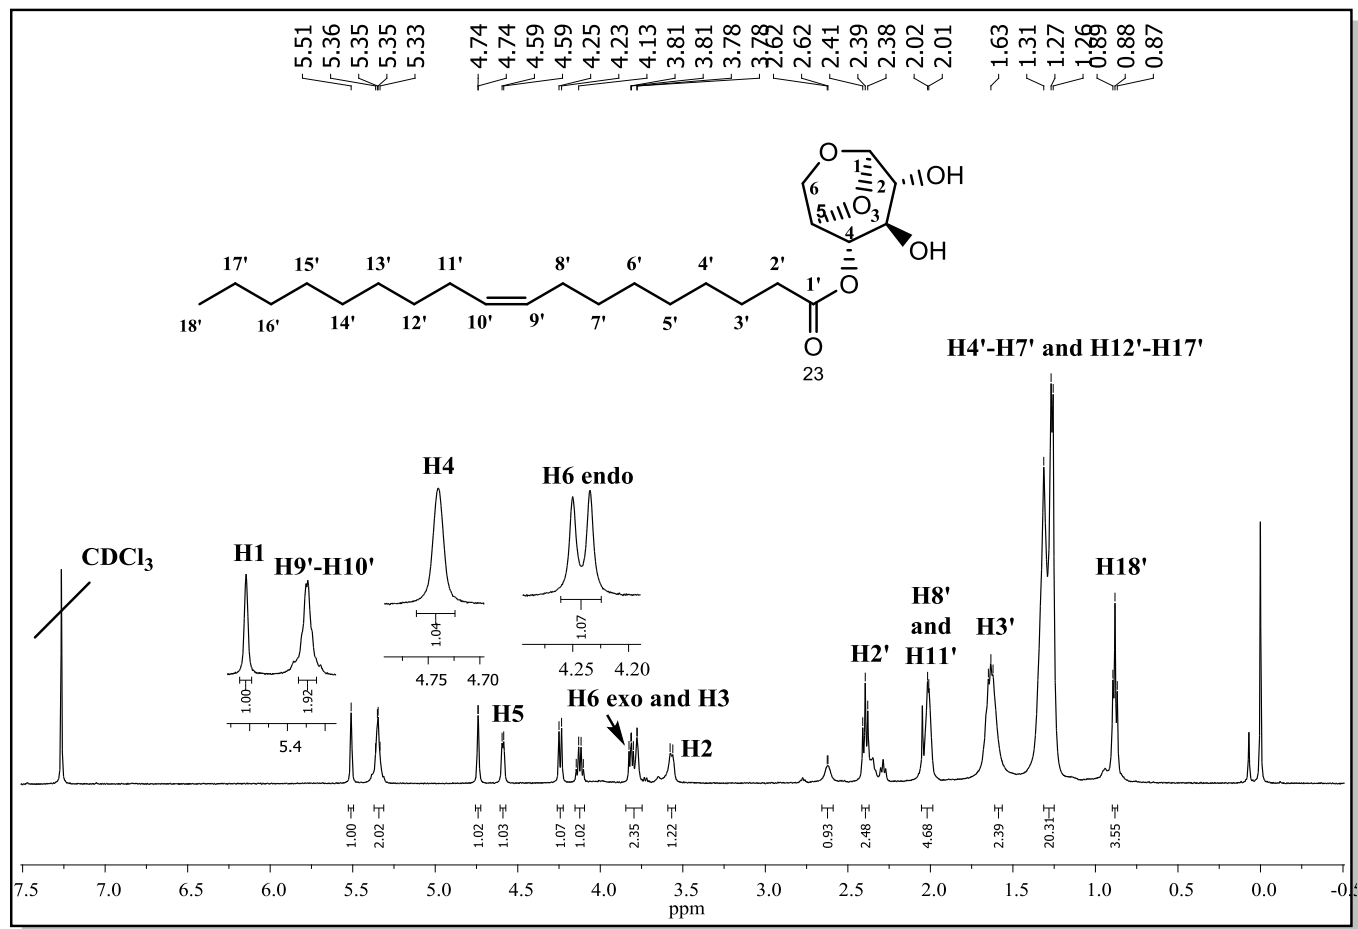

Figure 9: <sup>1</sup>H-NMR Spectrum for 4-O-Oleoyl-1,6-anhydroglucopyranose (CDCl<sub>3</sub>).

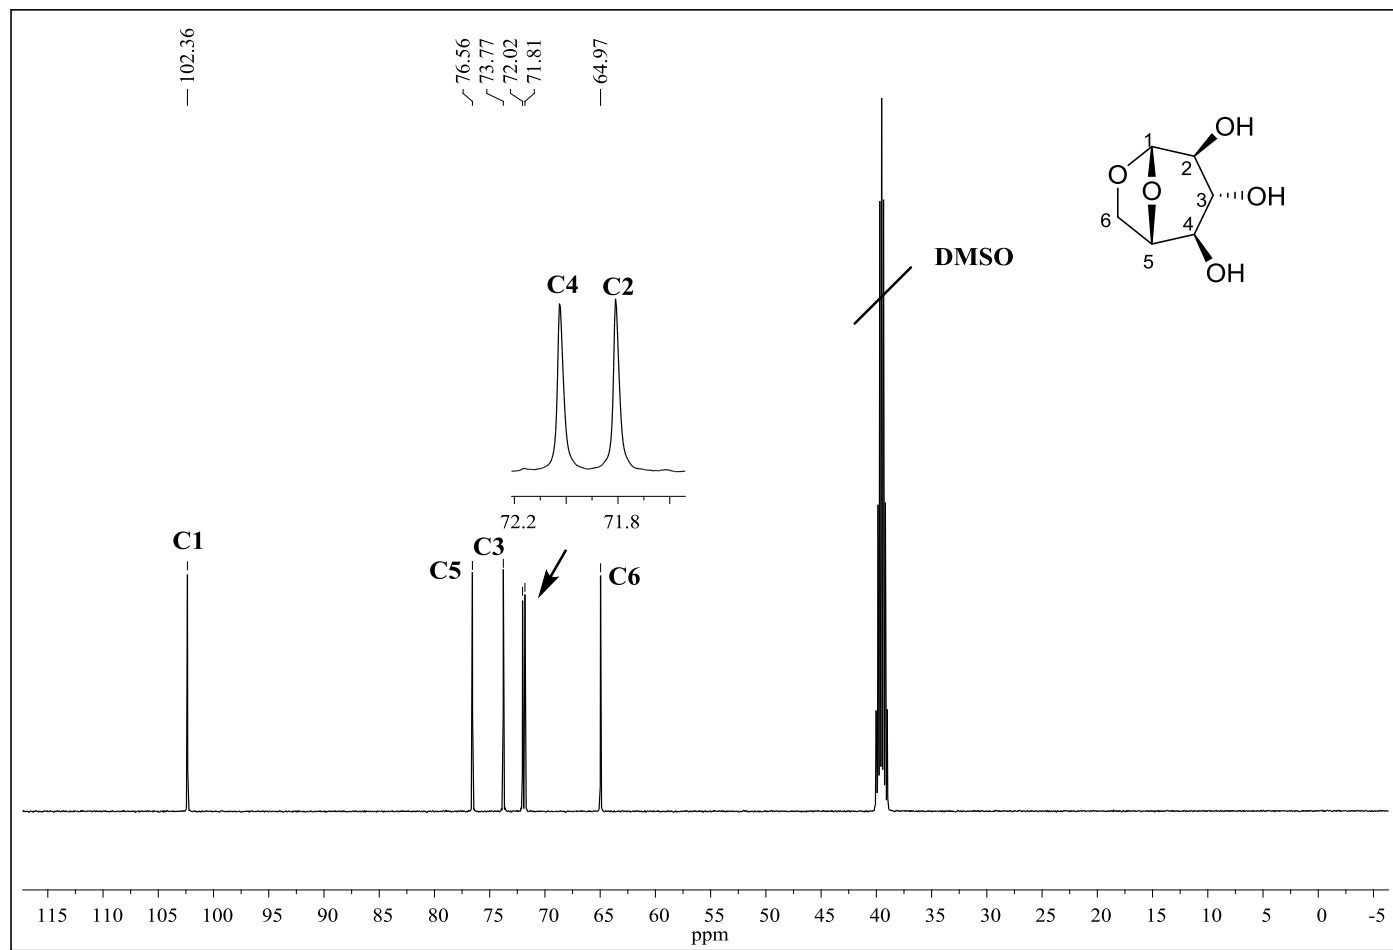

Figure 10:  $^{13}\text{C}$ -NMR Spectrum for levoglucosan (DMSO).

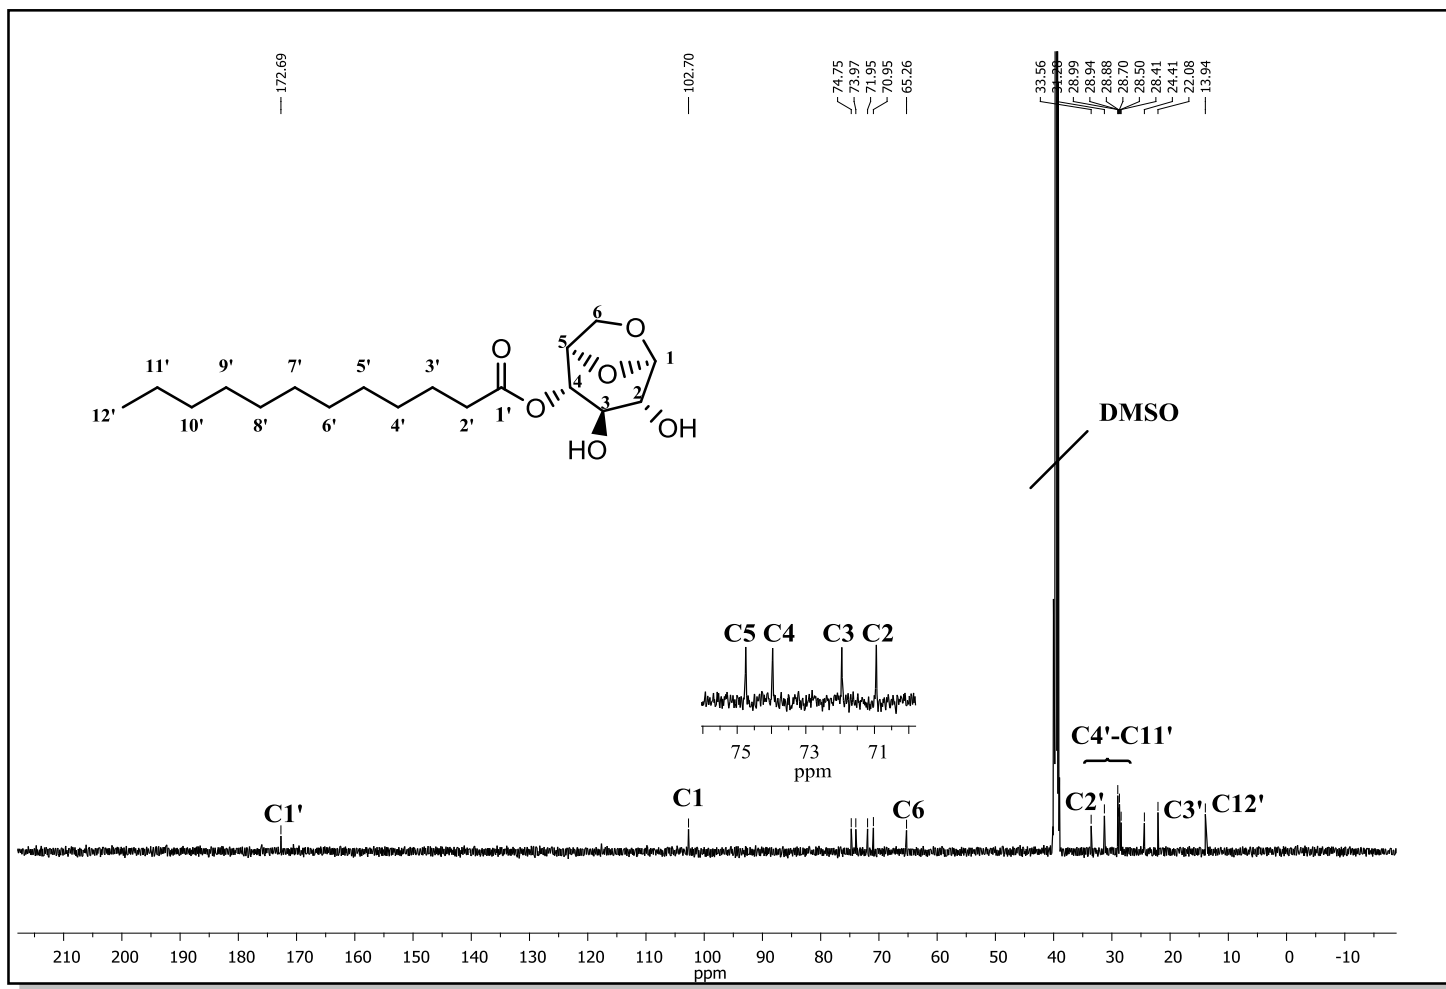

Figure 11:  $^{13}\text{C}$ -NMR Spectrum for 4-O-Lauryl-1,6-anhydroglucopyranose (CDCl<sub>3</sub>).

137  
138

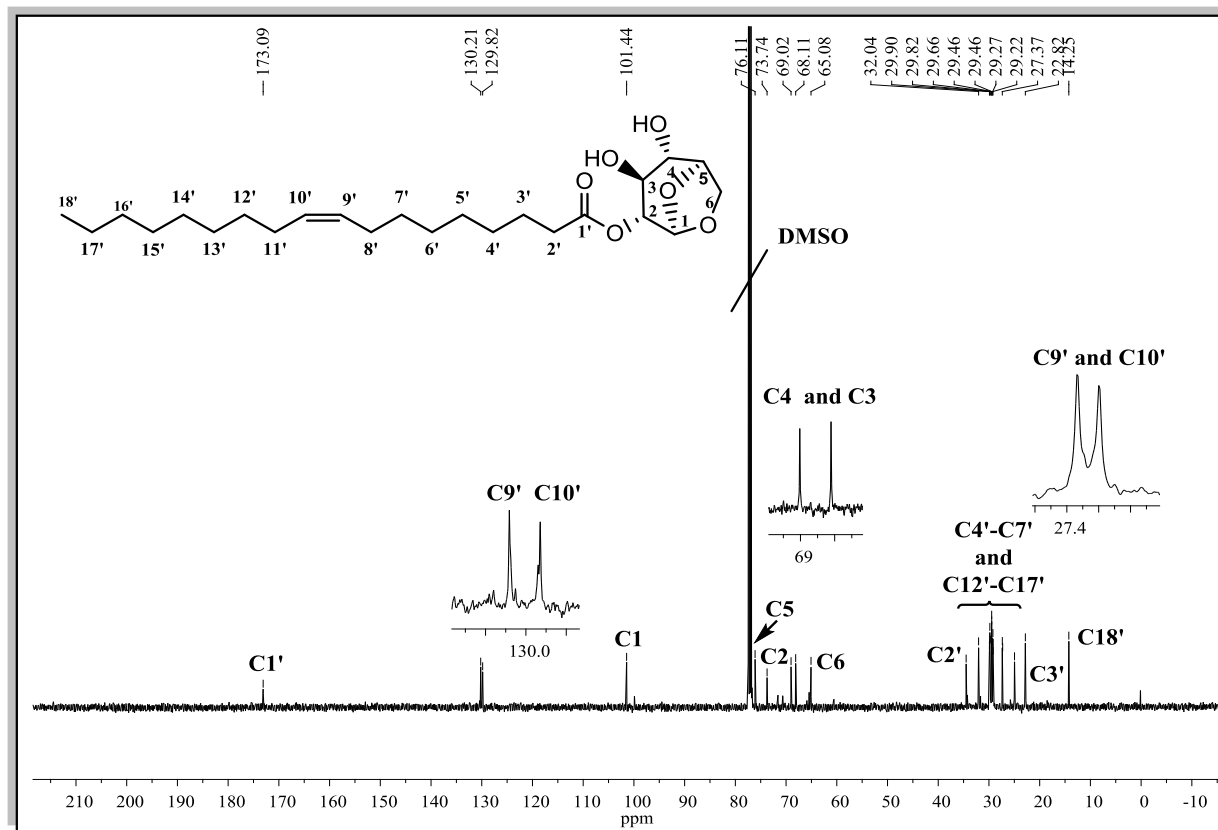

Figure 12:  $^{13}\text{C}$ -NMR Spectrum for 2-O-Oleoyl-1,6-anhydroglucopyranose ( $\text{CDCl}_3$ ).

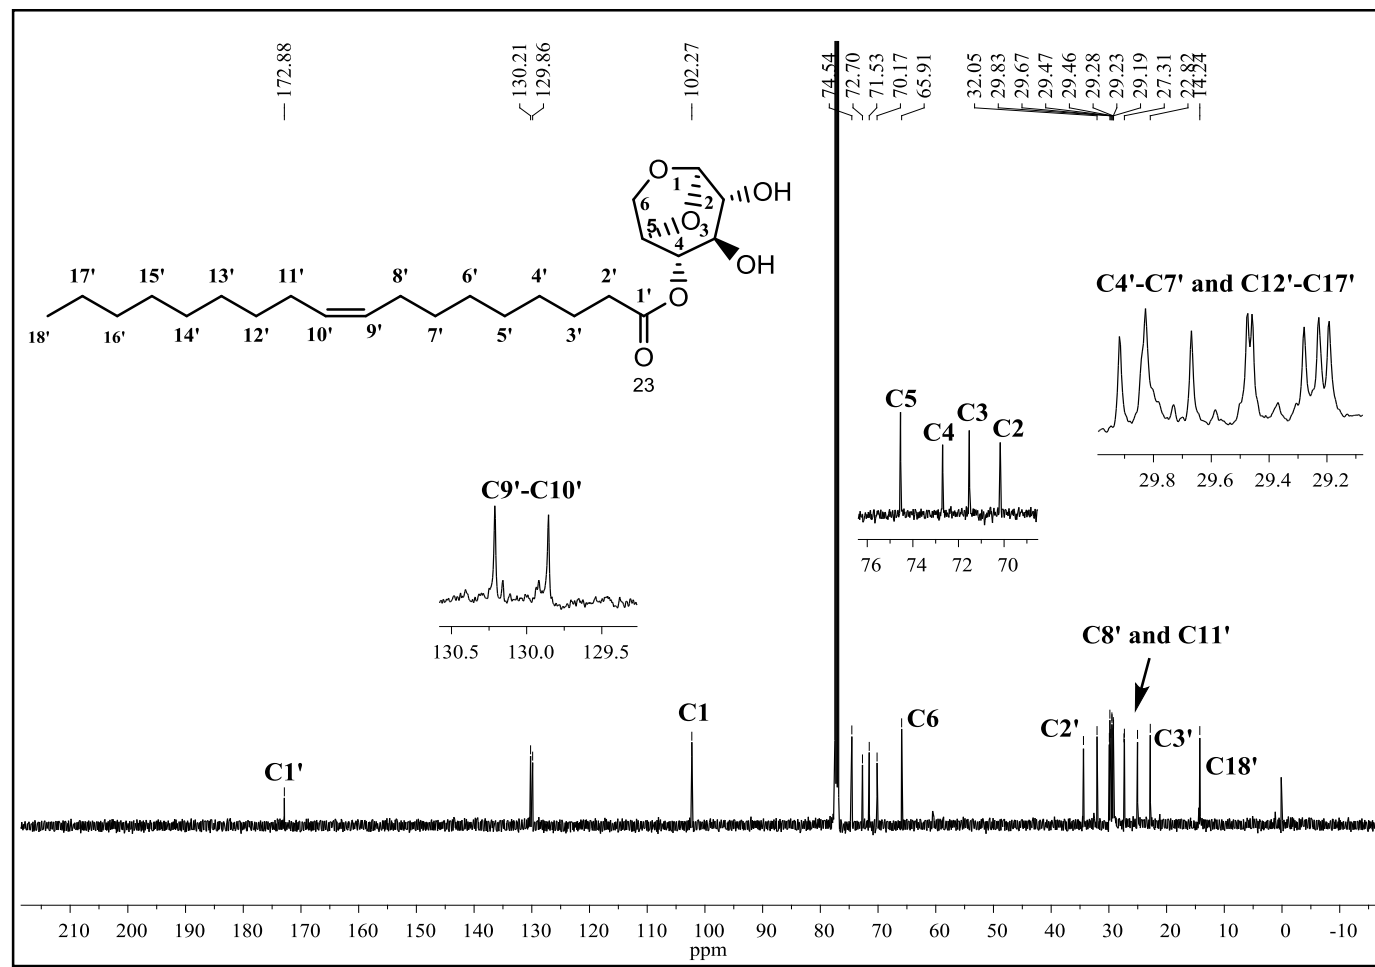

Figure 13: <sup>13</sup>C-NMR Spectrum for 4-O-Oleoyl-1,6-anhydroglucopyranose (CDCl<sub>3</sub>).



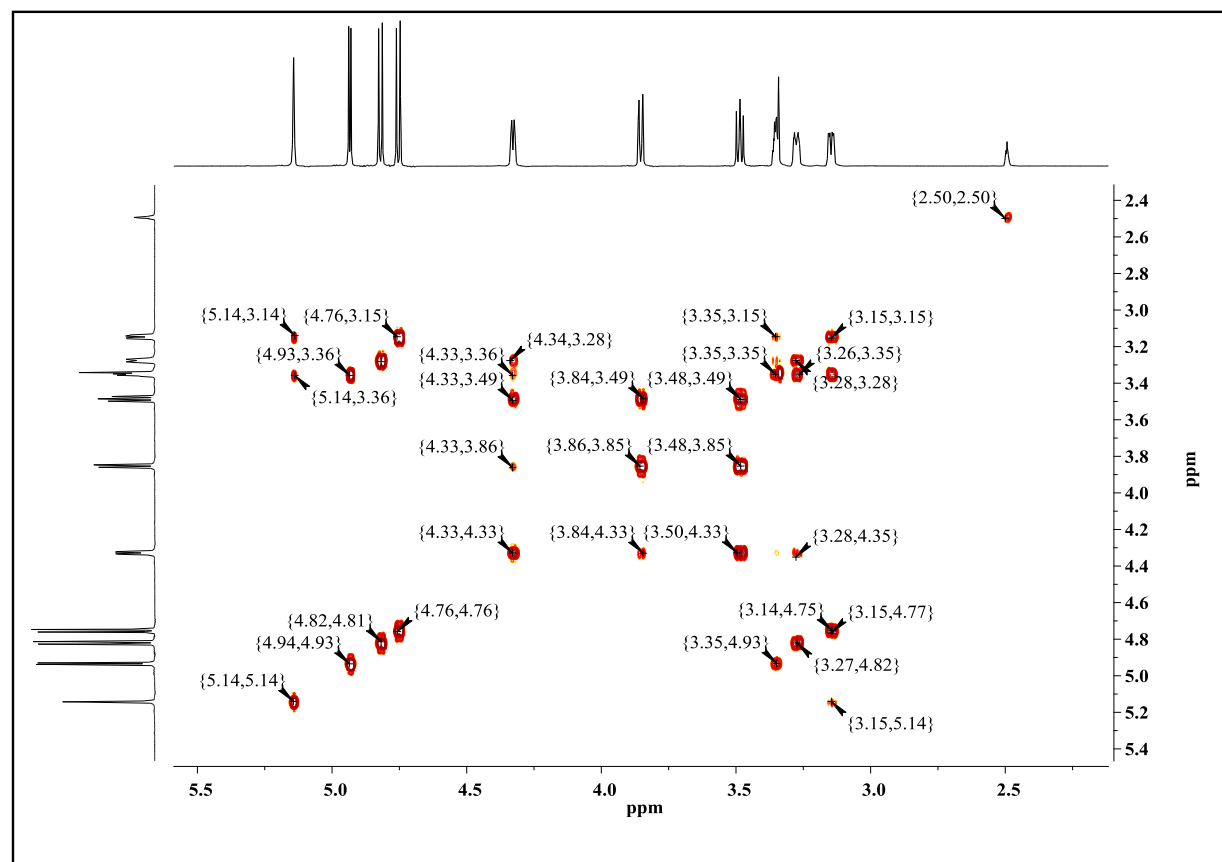

Figure 14:  $^1\text{H}$ ,  $^1\text{H}$  COSY for levoglucosan (DMSO).

144  
145

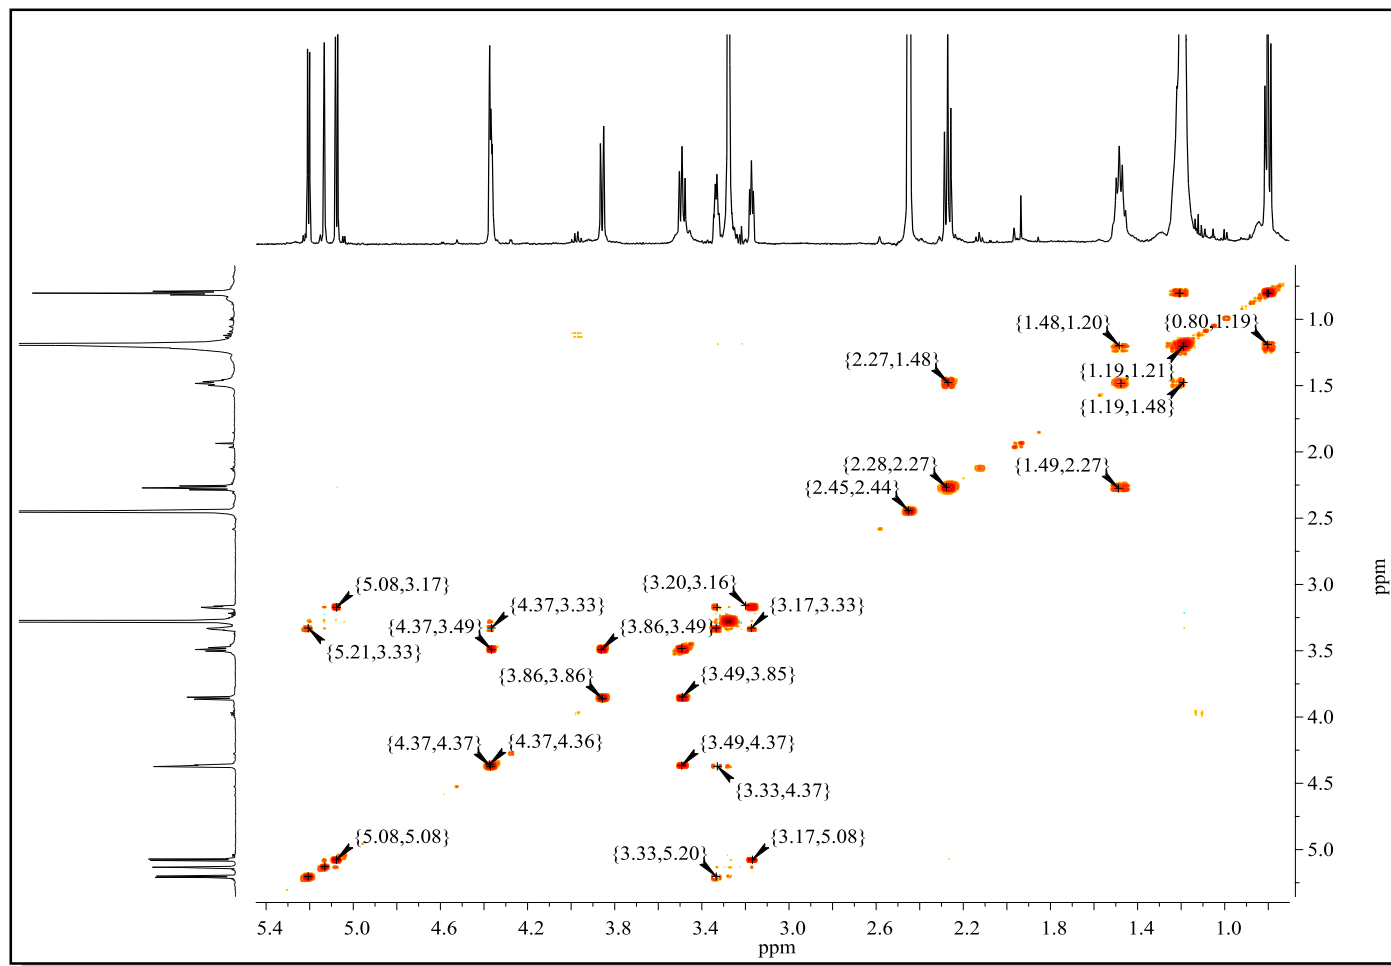

Figure 15:  $^1\text{H}$ ,  $^1\text{H}$  COSY for 4-O-Lauryl-1,6-anhydroglucopyranose ( $\text{CDCl}_3$ ).

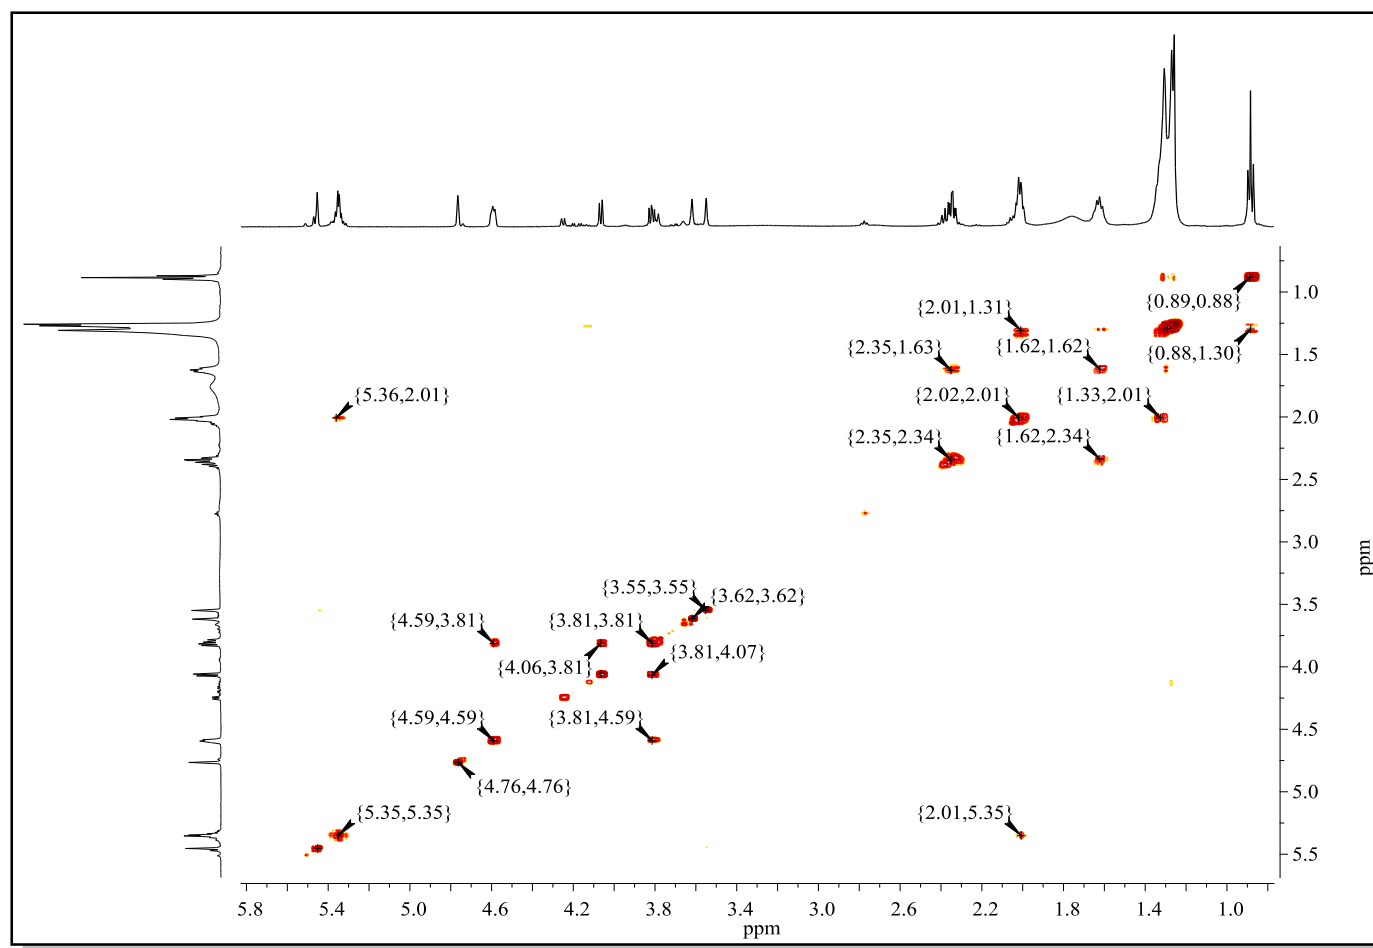

Figure 16:  $^1\text{H}$ ,  $^1\text{H}$  COSY for 2-O-Oleoyl-1,6-anhydroglucopyranose ( $\text{CDCl}_3$ ).

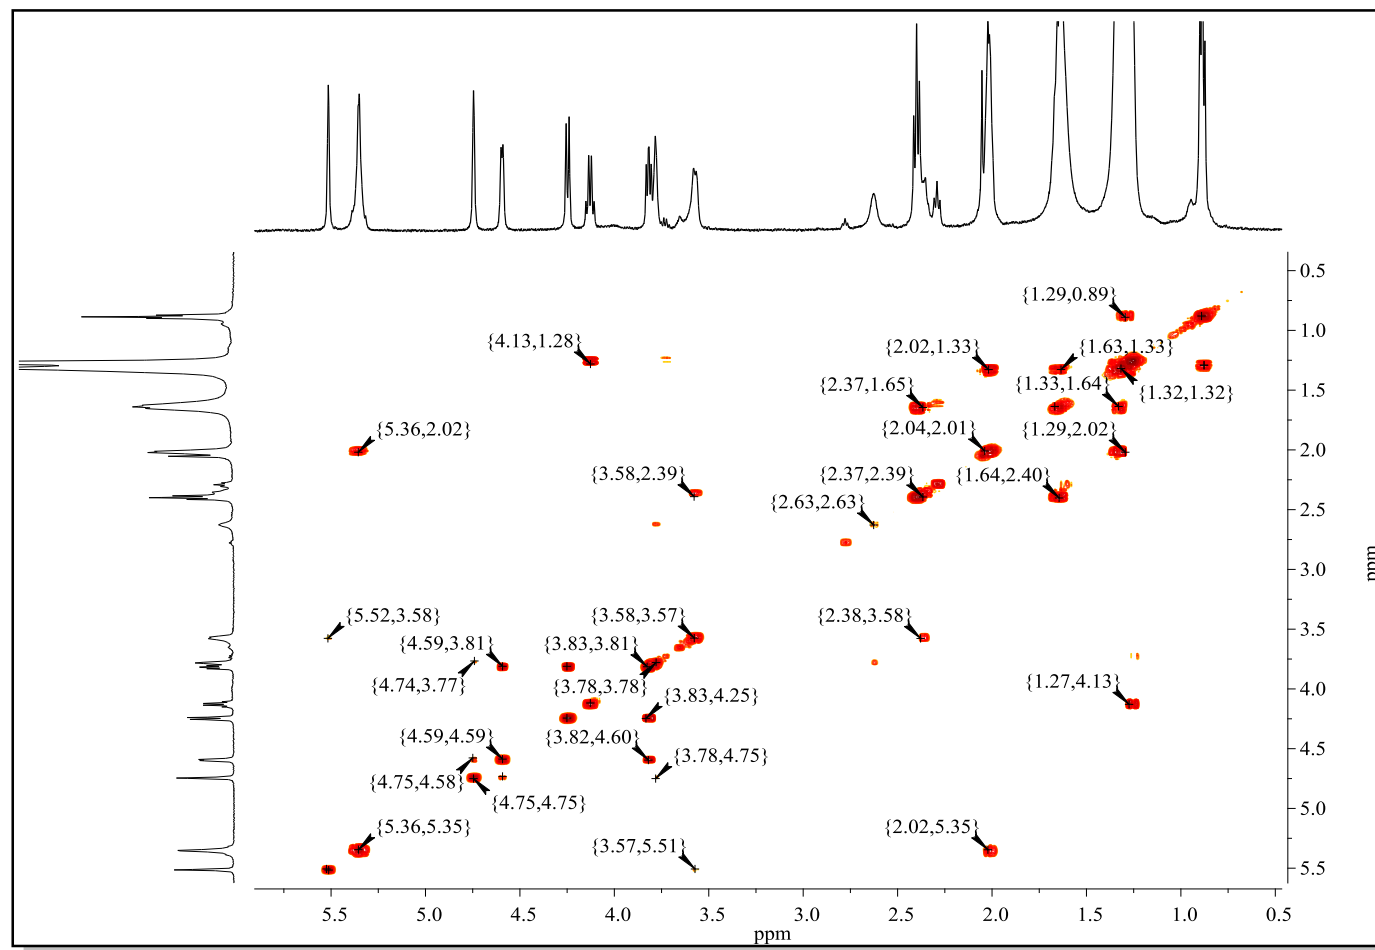

**Figure 17:**  $^1\text{H}$ ,  $^1\text{H}$  COSY for 4-O-Oleoyl-1,6-anhydroglucopyranose ( $\text{CDCl}_3$ ).

155  
156  
157  
158

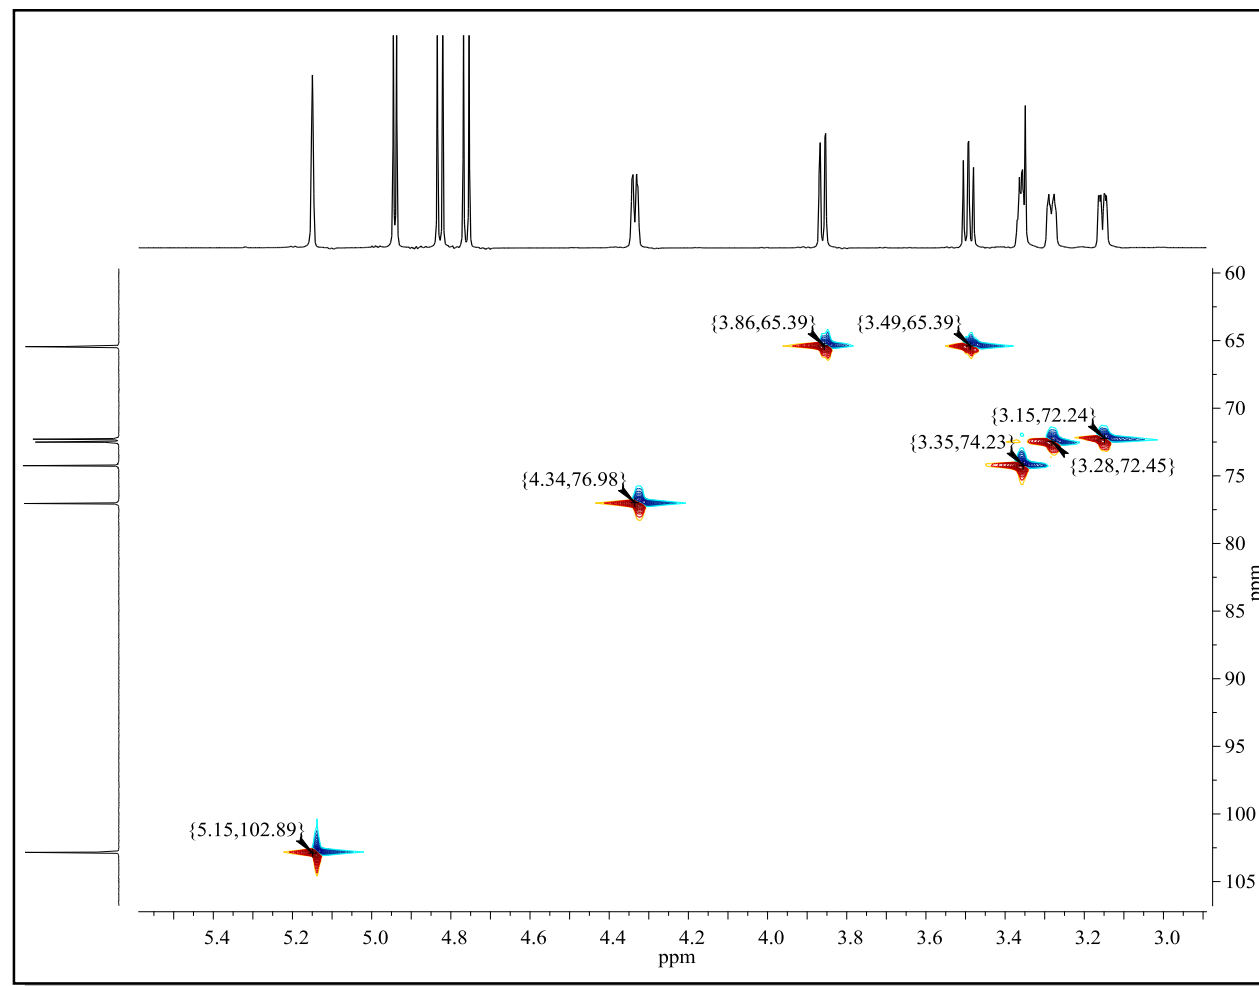

Figure 18: HSQC for levoglucosan (DMSO).

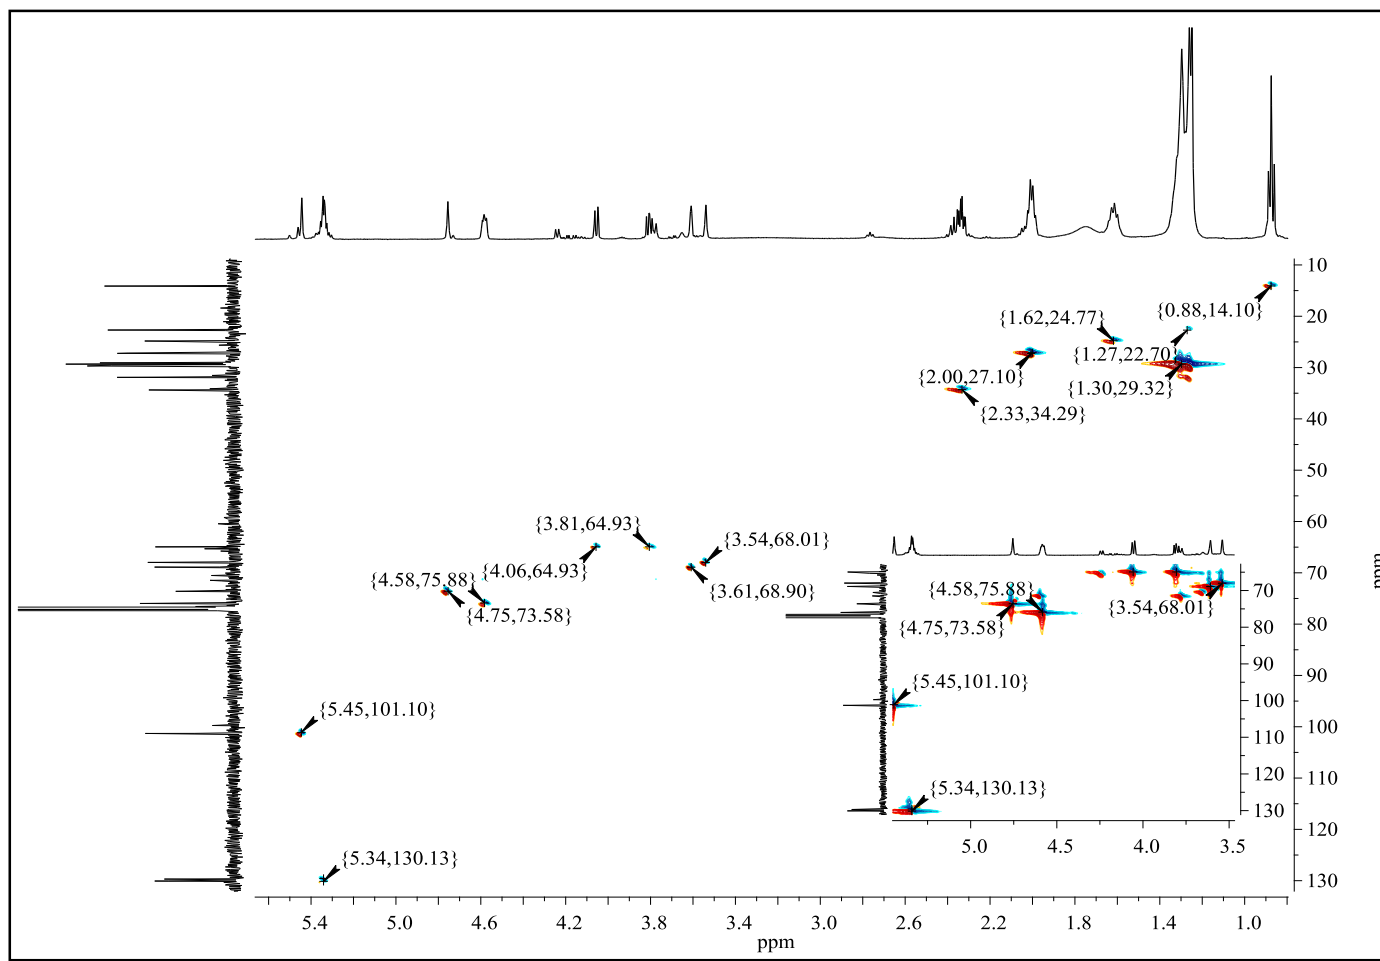

Figure 19: HSQC for 2-O-Oleoyl-1,6-anhydroglucopyranose (CDCl<sub>3</sub>).

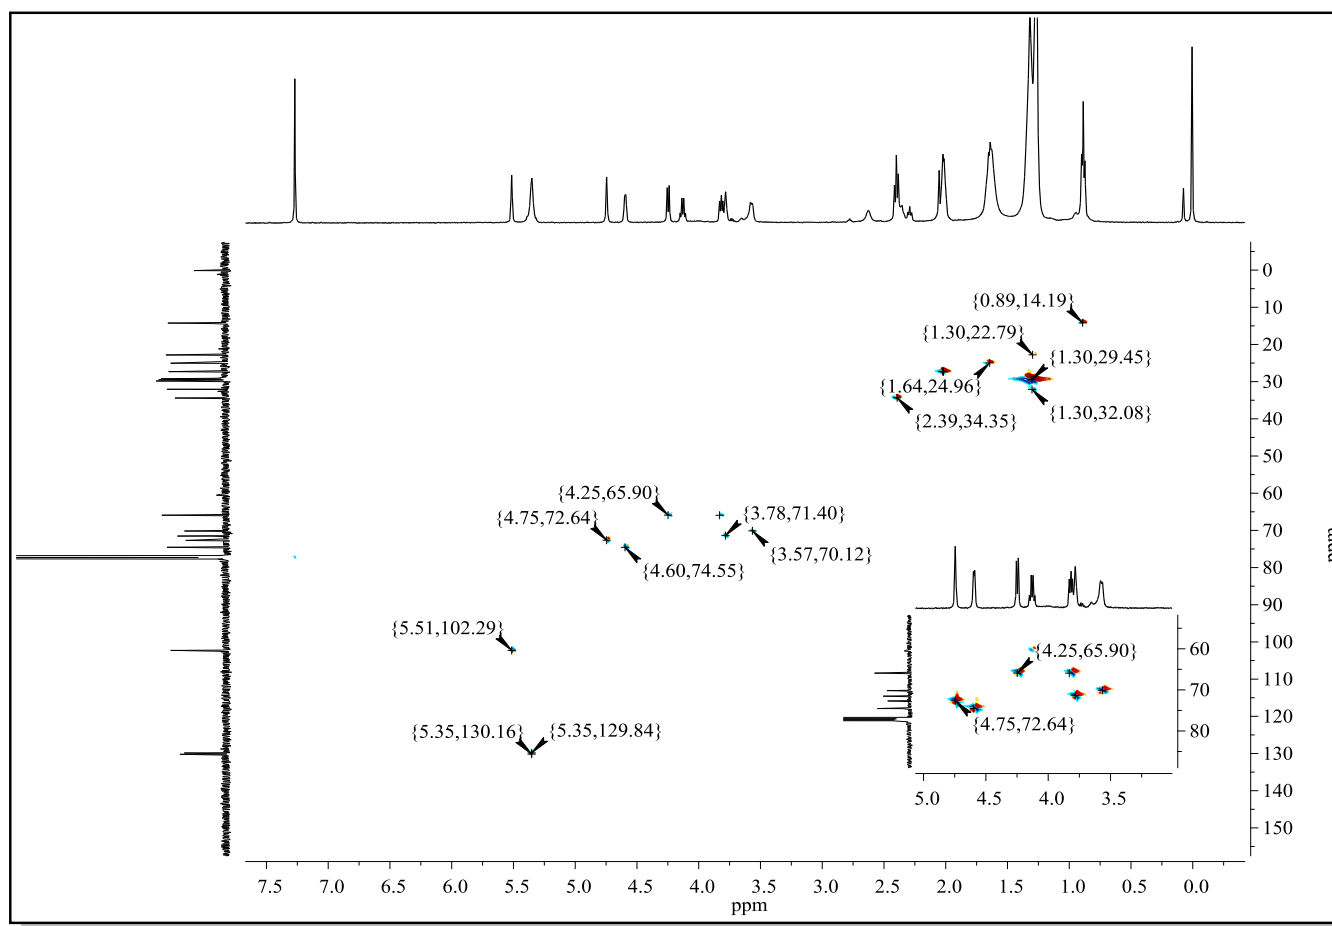

**Figura 20:** HSQC for 4-O-Oleoyl-1,6-anhydroglucopyranose (CDCl<sub>3</sub>).

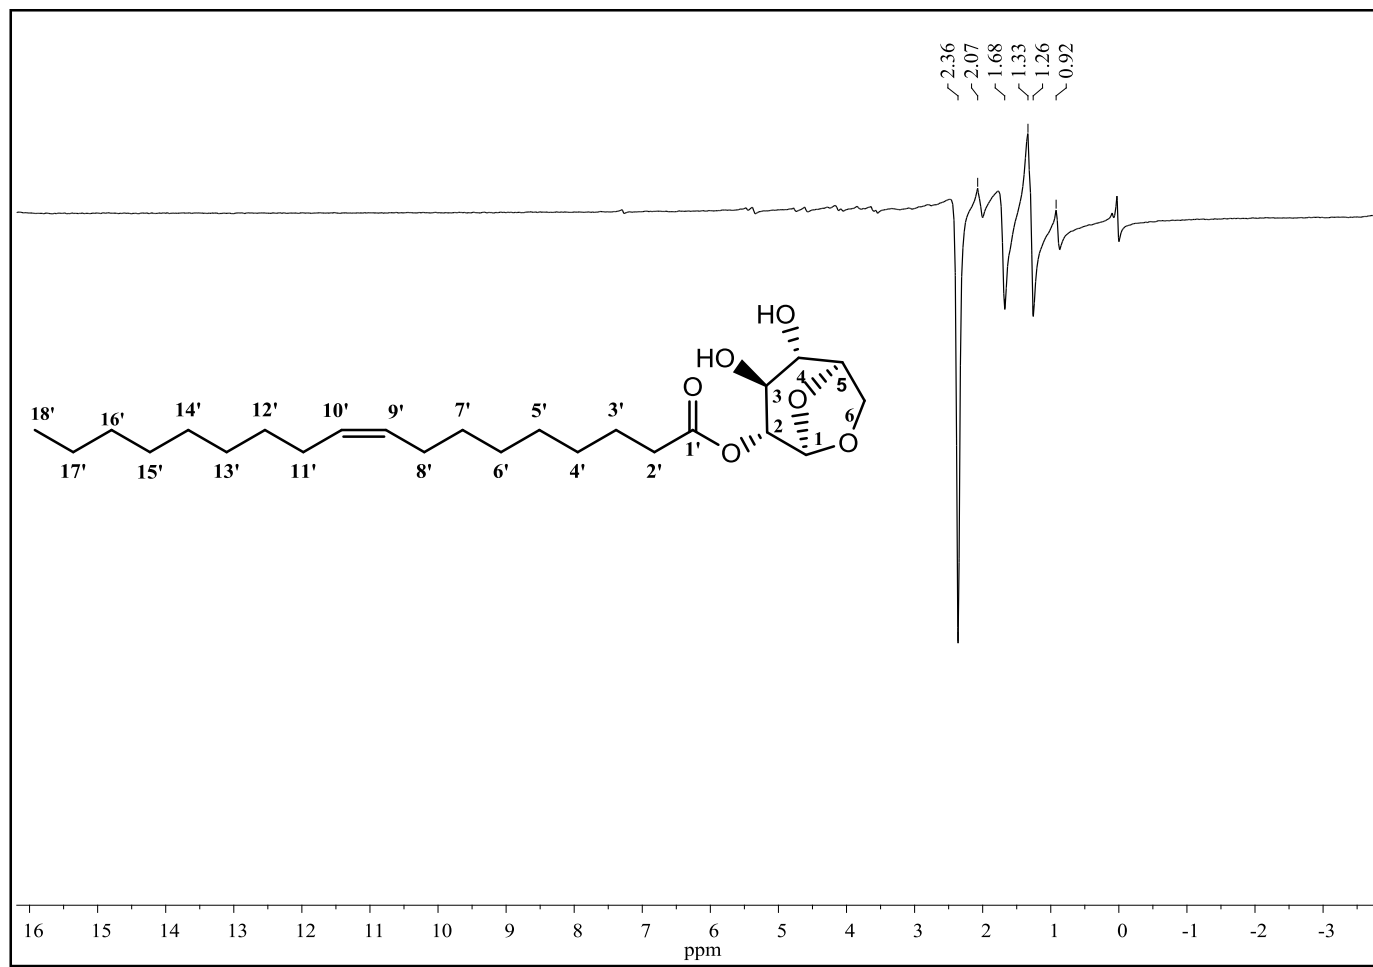

**Figure 21:** n.o.e difference spectra for irradiation in the H-2' compound 2-O-Oleoyl-1,6-anhydroglucopyranose (CDCl<sub>3</sub>).

168  
169  
170  
171



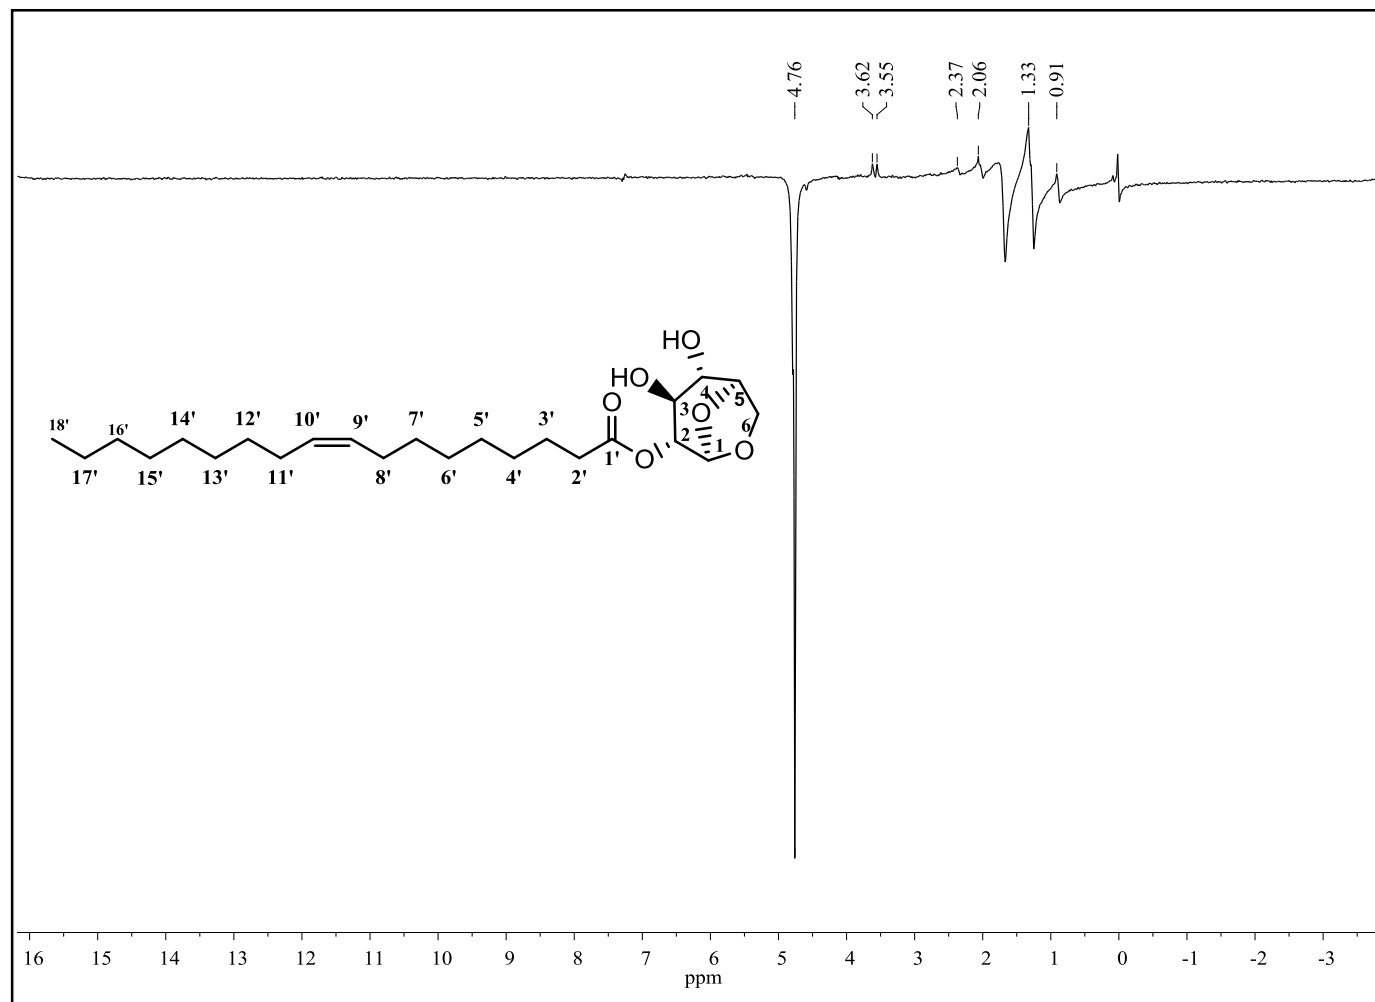

**Figura 22:** n.o.e difference spectra for irradiation in the H-2 compound 2-O-Oleoyl-1,6-anhydroglucopyranose (CDCl<sub>3</sub>).

176

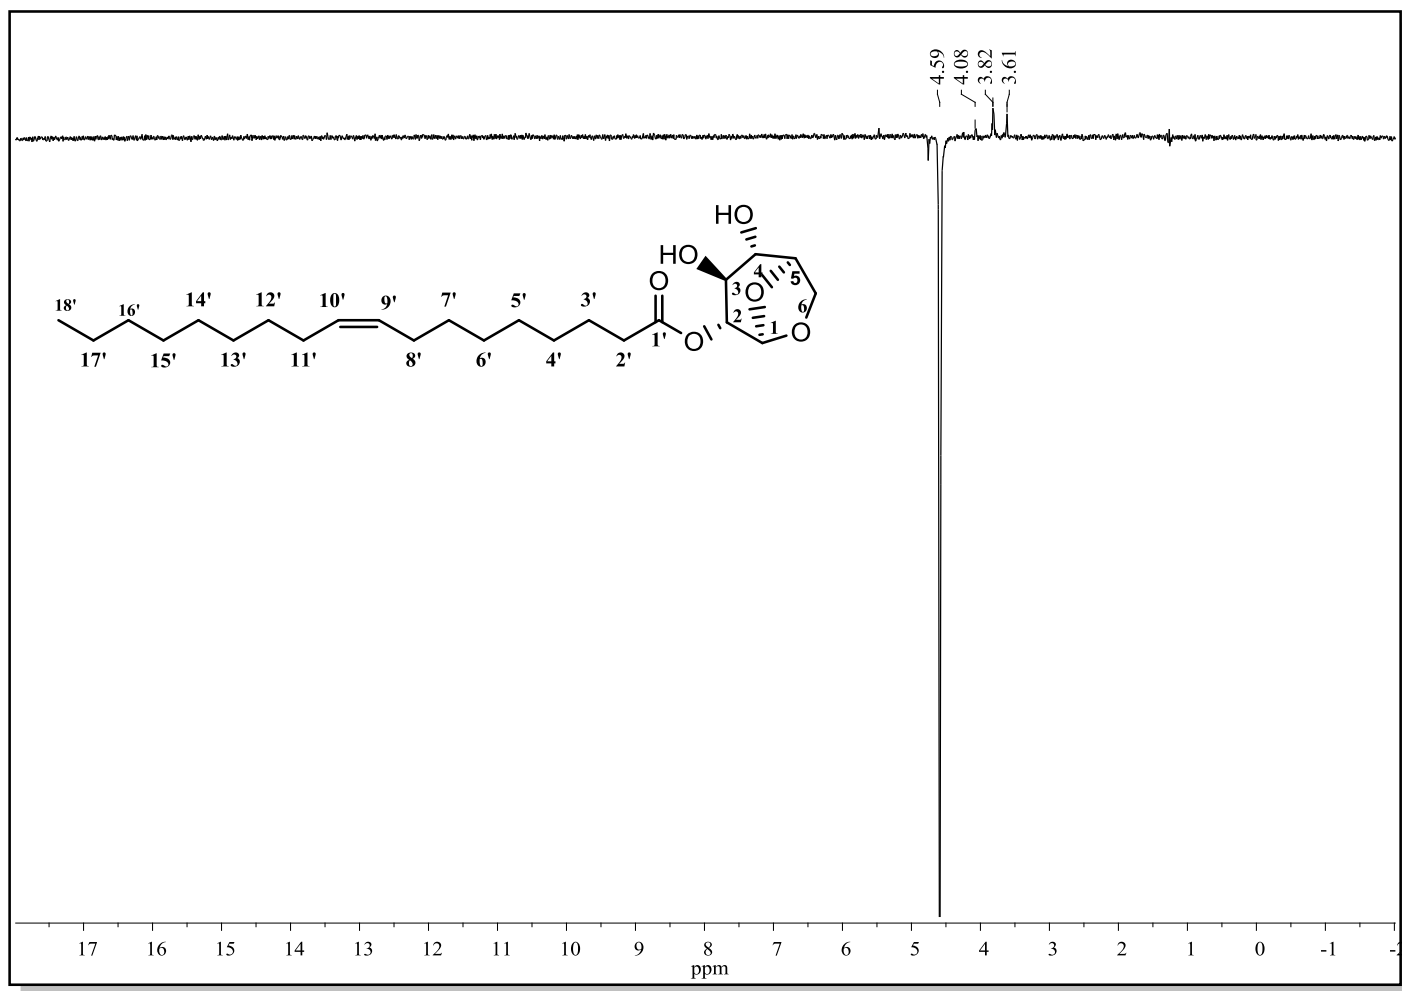177  
178  
179

**Figura 23:** n.o.e difference spectra for irradiation in the H-5 compound 2-O-Oleoyl-1,6-anhydroglucopyranose ( $\text{CDCl}_3$ ).

180

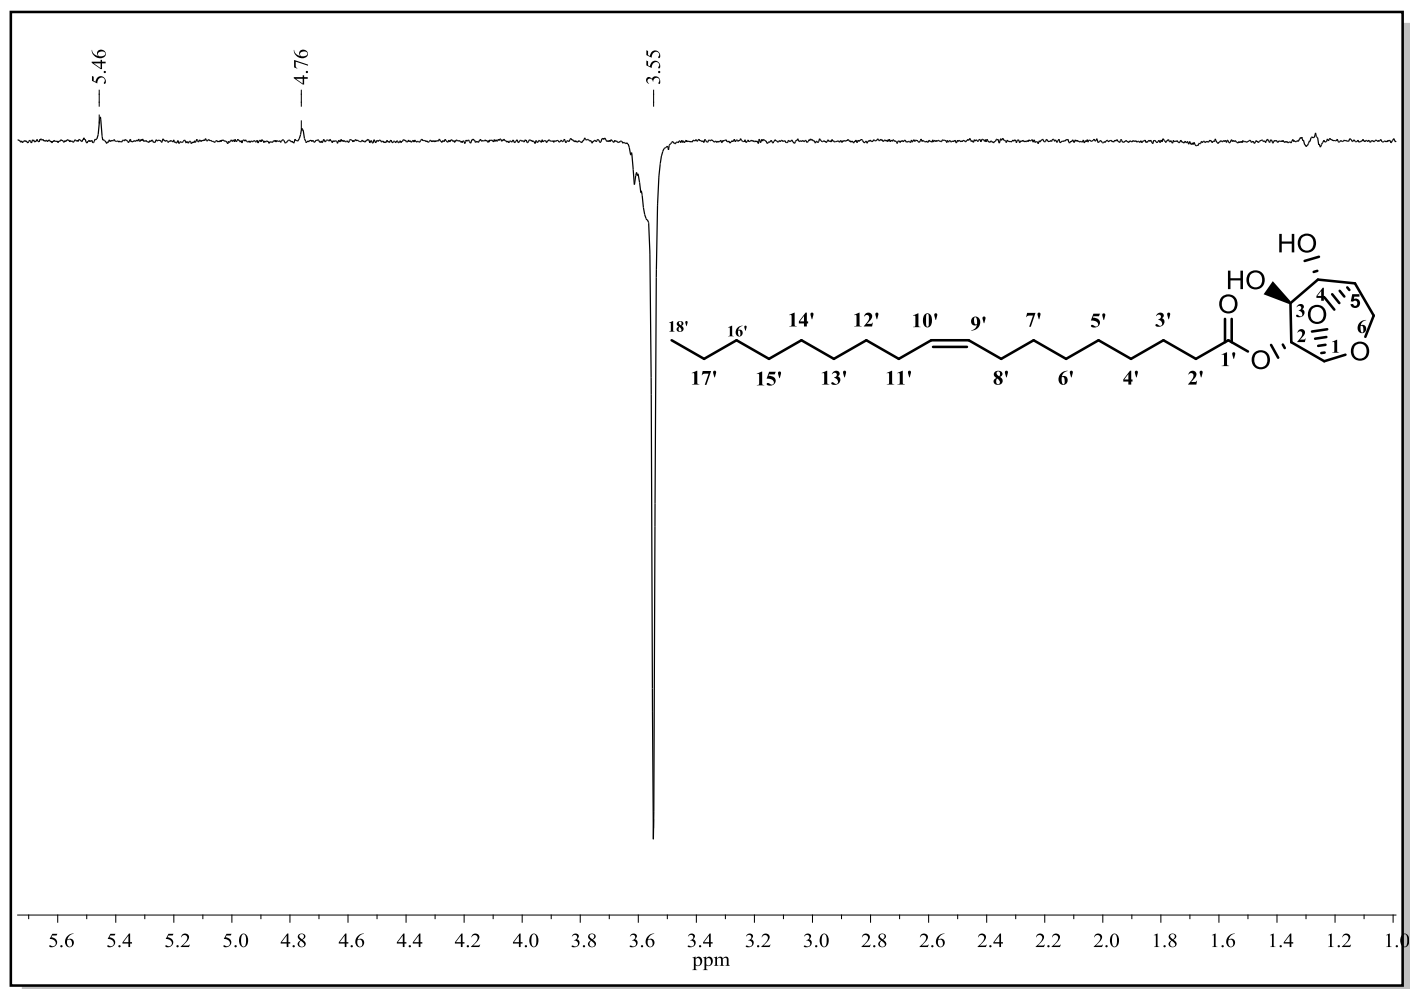181  
182  
183

**Figure 24:** n.o.e difference spectra for irradiation in the H-3 compound 2-O-Oleoyl-1,6-anhydroglucopyranose ( $\text{CDCl}_3$ ).

184

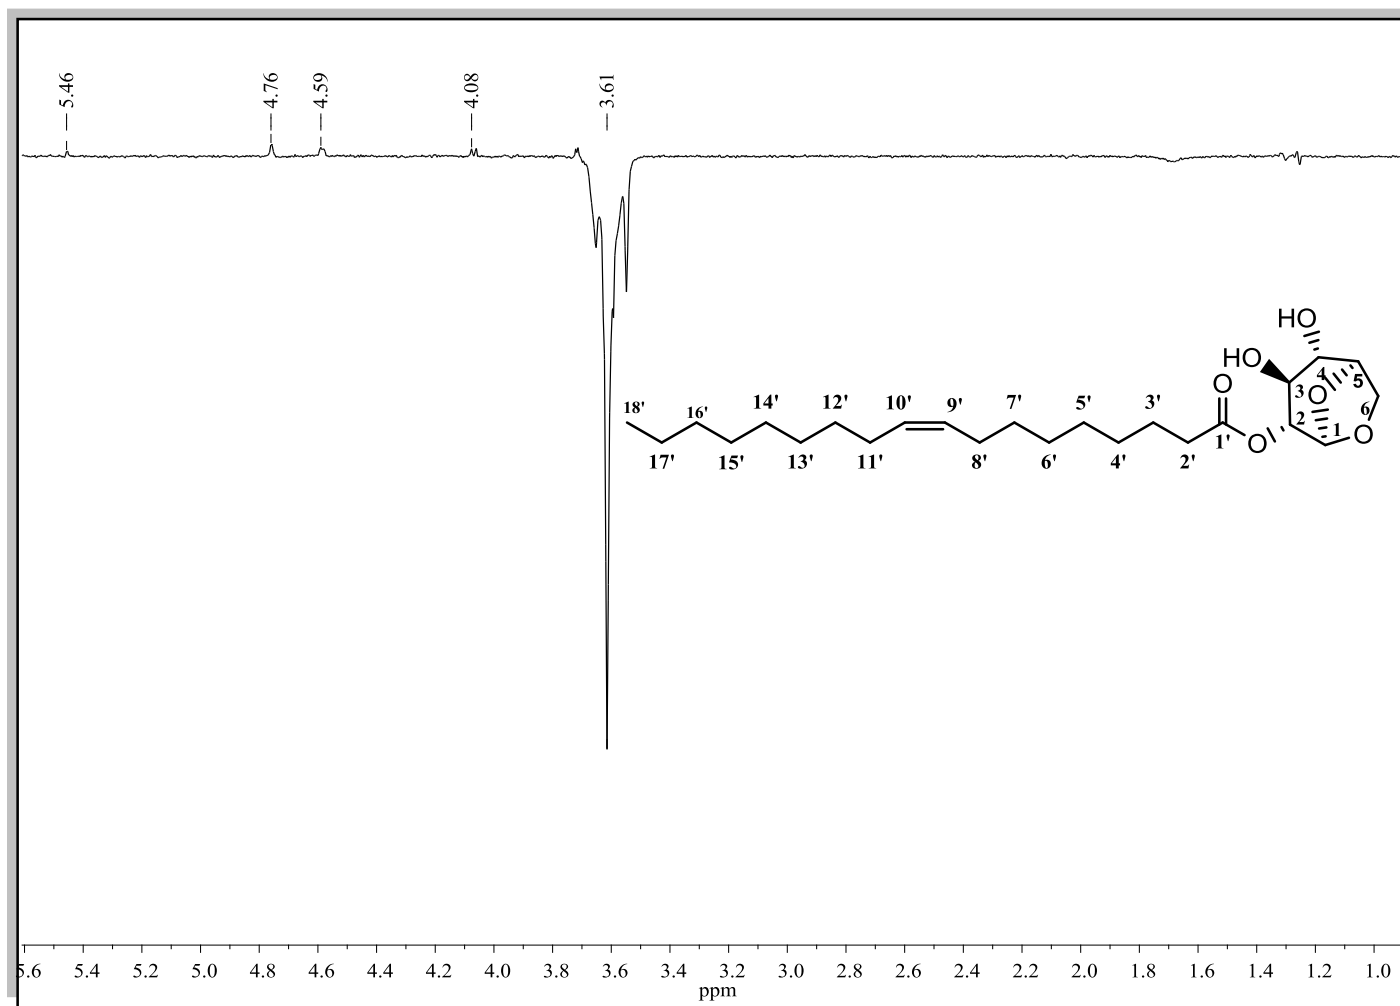185  
186  
187

**Figura 25:** n.o.e difference spectra for irradiation in the H-4 compound 2-O-Oleoyl-1,6-anhydroglucopyranose ( $\text{CDCl}_3$ ).
